# Supplementary material for: Correcting palindromes in long reads after whole-genome amplification
Source: PubMed Central journal article supplement (PMC6218980; doi:10.1186/s12864-018-5164-1), 2018-11-06

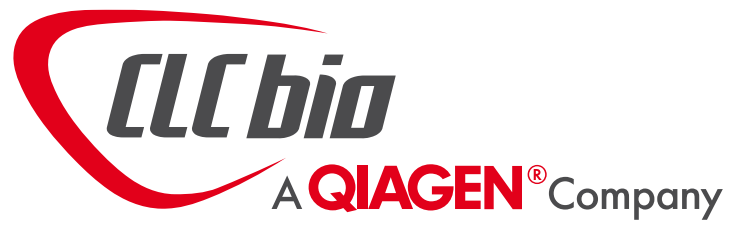

Mapping Report for ath noWGA BLASR-mapping  
Type: Read mapping  
Reference count: 7  
Generated by: warri004  
Date: Thu Apr 28 01:08:24 CEST 2016  
Software: CLC Genomics Server 7.5.1

## Table of contents

|                                                                     |    |
|---------------------------------------------------------------------|----|
| 1. Summary .....                                                    | 3  |
| 2. References .....                                                 | 3  |
| 2.1 Reference coverage .....                                        | 3  |
| 2.2 Coverage statistics .....                                       | 3  |
| 2.3 Coverage level distribution .....                               | 4  |
| 2.4 Coverage level distribution (excl. zero coverage regions) ..... | 5  |
| 2.5 Zero coverage regions .....                                     | 6  |
| 2.6 Coverage vs GC Content Plot .....                               | 6  |
| 3. Mapped reads .....                                               | 6  |
| 3.1 All mapped reads .....                                          | 6  |
| 3.2 Non-specific matches .....                                      | 7  |
| 3.3 Non-perfect matches .....                                       | 8  |
| 3.4 Read length distribution .....                                  | 11 |
| 3.5 Insertion length distribution .....                             | 12 |
| 3.6 Deletion length distribution .....                              | 13 |
| 3.7 Nucleotide differences in reads relative to reference .....     | 13 |
| 3.8 Nucleotide Mapping .....                                        | 13 |
| 3.9 Quality for match distribution .....                            | 17 |
| 3.10 Quality for mismatch distribution .....                        | 17 |
| 3.11 Mismatch fraction per read position .....                      | 18 |
| 3.12 Unaligned ends .....                                           | 18 |

# 1. Summary

|                        |               |
|------------------------|---------------|
| Reference count        | 7             |
| Type                   | Read mapping  |
| Total reference length | 119,667,750   |
| GC contents in %       | 36.00         |
| Total read count       | 892,146       |
| Mean read length       | 5,799.85      |
| Total read length      | 5,174,315,491 |

# 2. References

## 2.1 Reference coverage

|                               |             |
|-------------------------------|-------------|
| Total reference length        | 119,667,750 |
| % GC                          | 36.00       |
| Total consensus length        | -           |
| Fraction of reference covered | 0.97        |

## 2.2 Coverage statistics

|                                                |             |
|------------------------------------------------|-------------|
| Total reference length                         | 119,667,750 |
| Minimum coverage                               | 0           |
| Maximum coverage                               | 12,116      |
| Average coverage                               | 34.24       |
| Standard deviation                             | 269.42      |
| Minimum excl. zero coverage regions            | 1           |
| Average excl. zero coverage regions            | 35.42       |
| Standard deviation excl. zero coverage regions | 274.06      |

## 2.3 Coverage level distribution

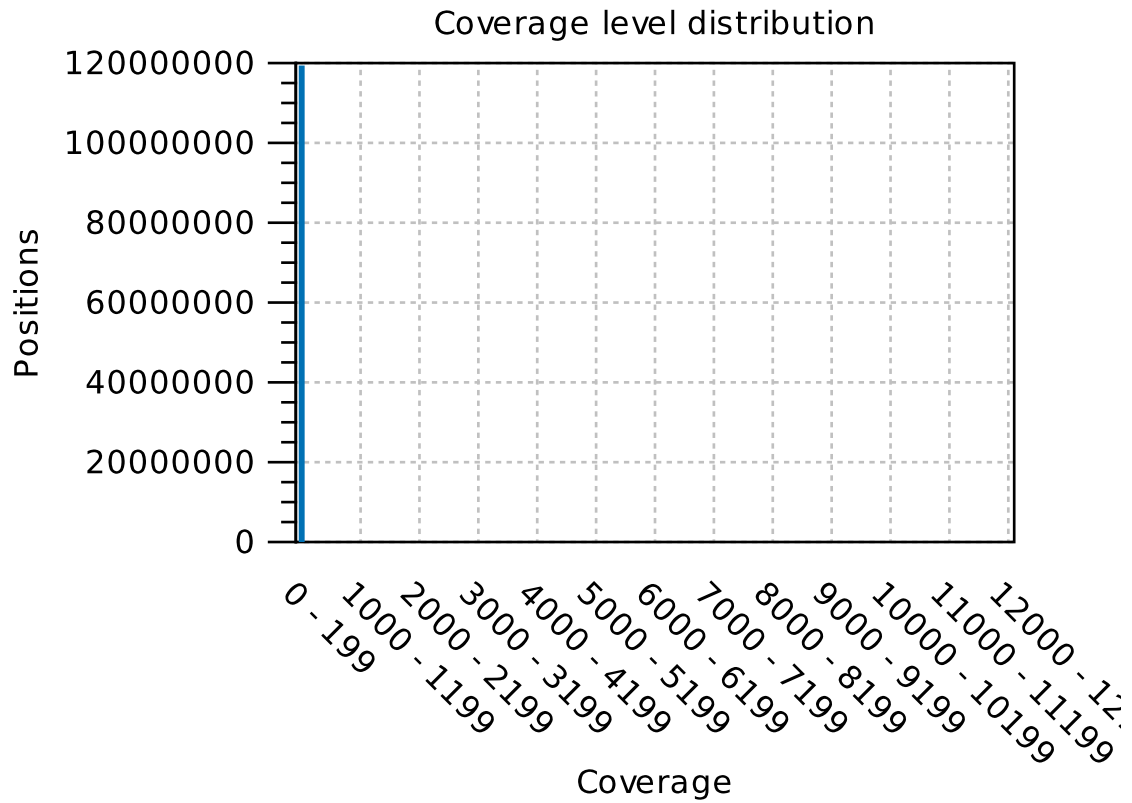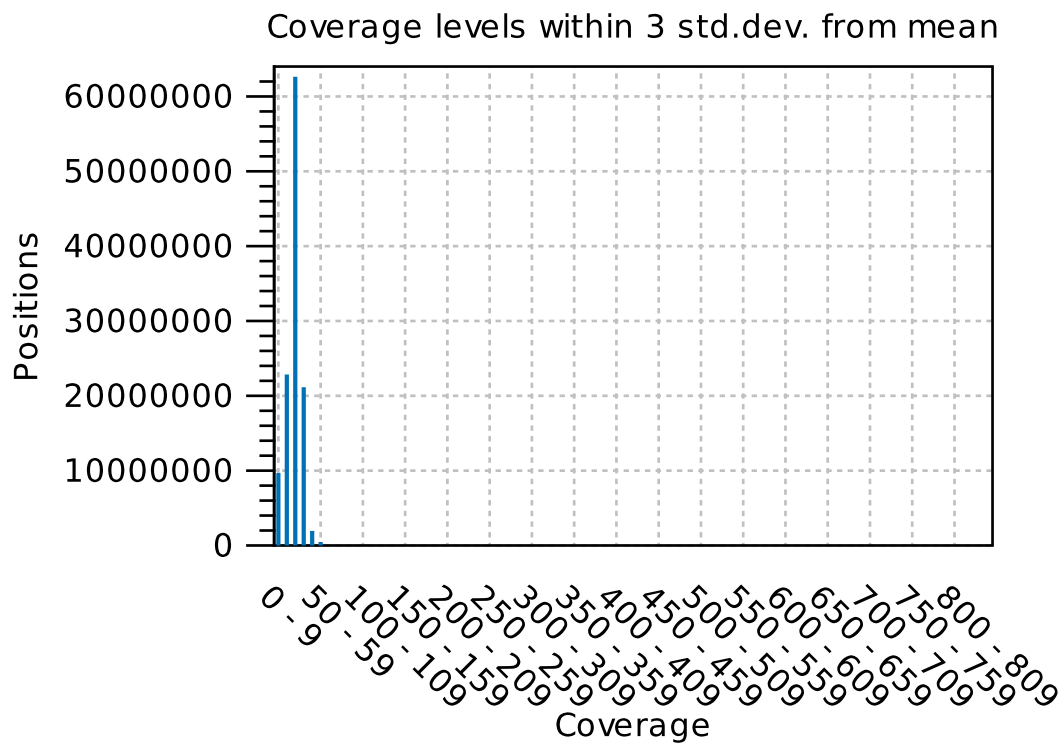

119,449,424 positions have coverage between 0 and 842.  
218,326 positions have coverage above 842 (not shown in graph).

## 2.4 Coverage level distribution (excl. zero coverage regions)

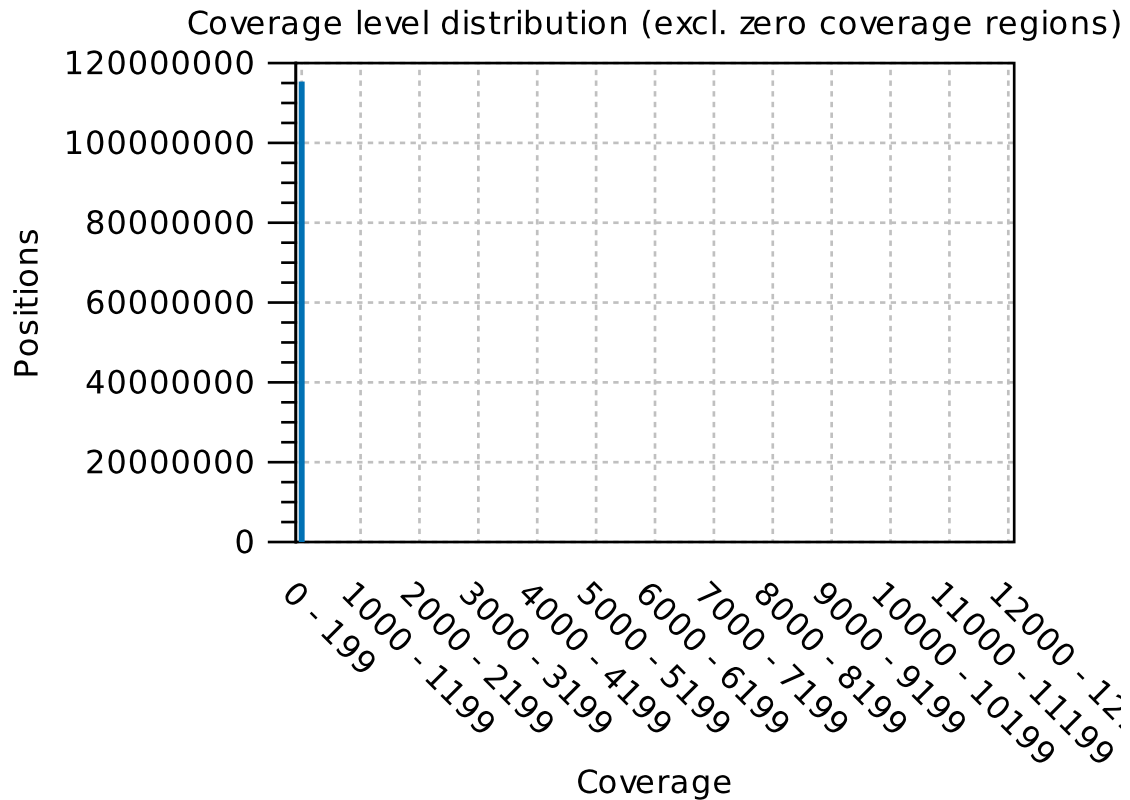

4,010,703 positions have zero coverage (not shown in graph).

Coverage levels within 3 std.dev. from mean (excl. zero coverage)

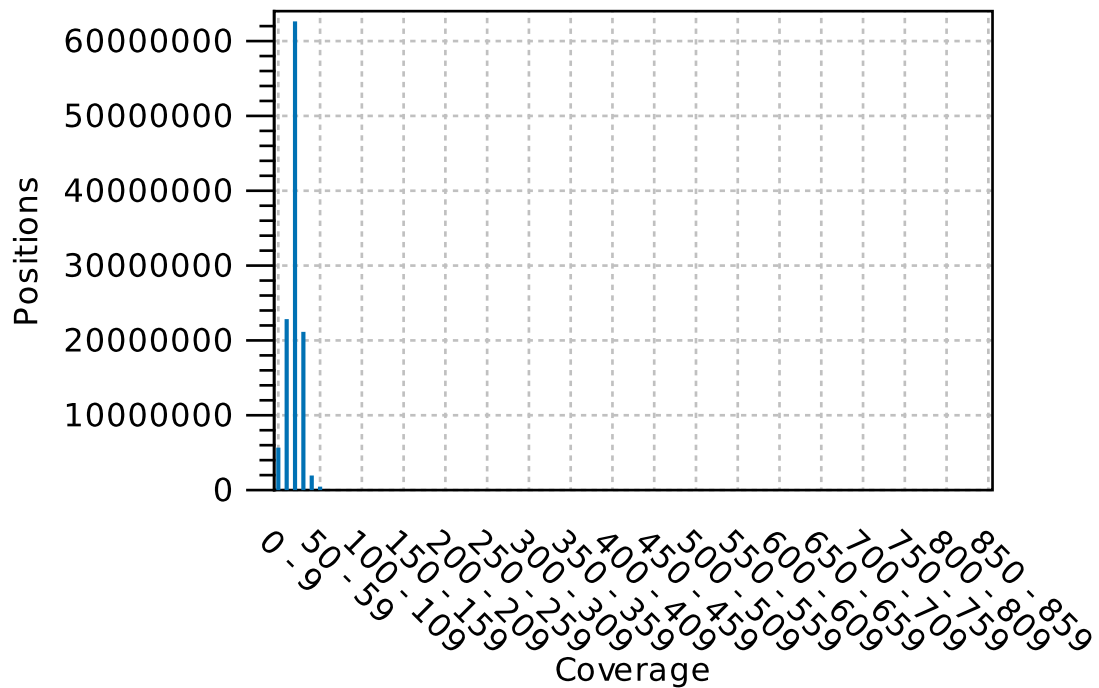

4,010,703 positions have coverage below 1 (not shown in graph).

115,439,386 positions have coverage between 1 and 857.

217,661 positions have coverage above 857 (not shown in graph).

## 2.5 Zero coverage regions

|                    |           |
|--------------------|-----------|
| Count              | 2,161     |
| Minimum length     | 1         |
| Maximum length     | 53,746    |
| Mean length        | 1,855.95  |
| Standard deviation | 3,237.71  |
| Total length       | 4,010,703 |

## 2.6 Coverage vs GC Content Plot

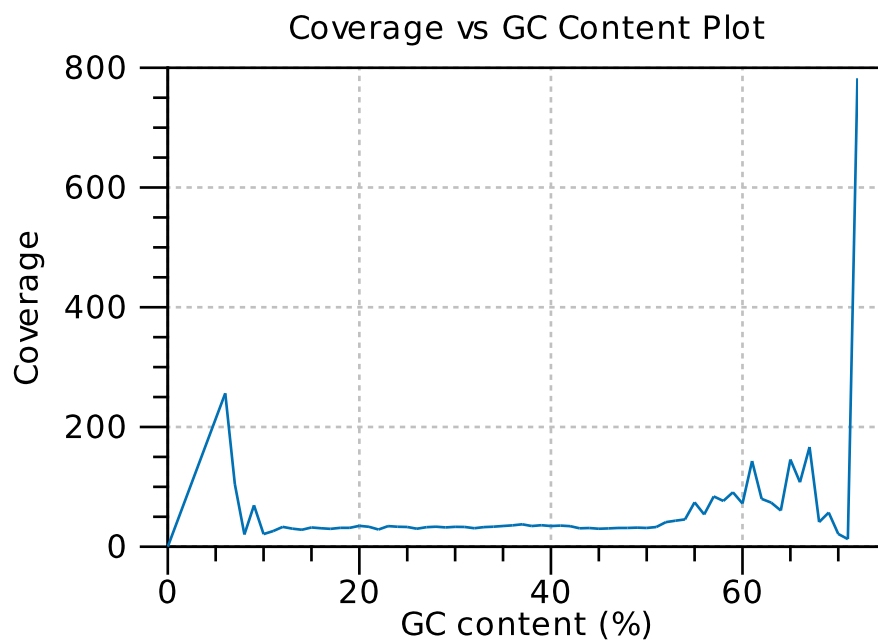

The plot displays, for each GC content level (0-100%), the mean read coverage of 100bp reference segments with that GC content.

## 3. Mapped reads

### 3.1 All mapped reads

|                   |               |
|-------------------|---------------|
| Read count        | 892,146       |
| Mean read length  | 5,799.85      |
| Total read length | 5,174,315,491 |

## 3.2 Non-specific matches

### *Non-specific matches*

|                       |             |
|-----------------------|-------------|
| Read count            | 87,149      |
| % of all mapped reads | 9.77        |
| Mean read length      | 5,368.25    |
| Total read length     | 467,837,994 |

### *Distribution of match specificity (all matches)*

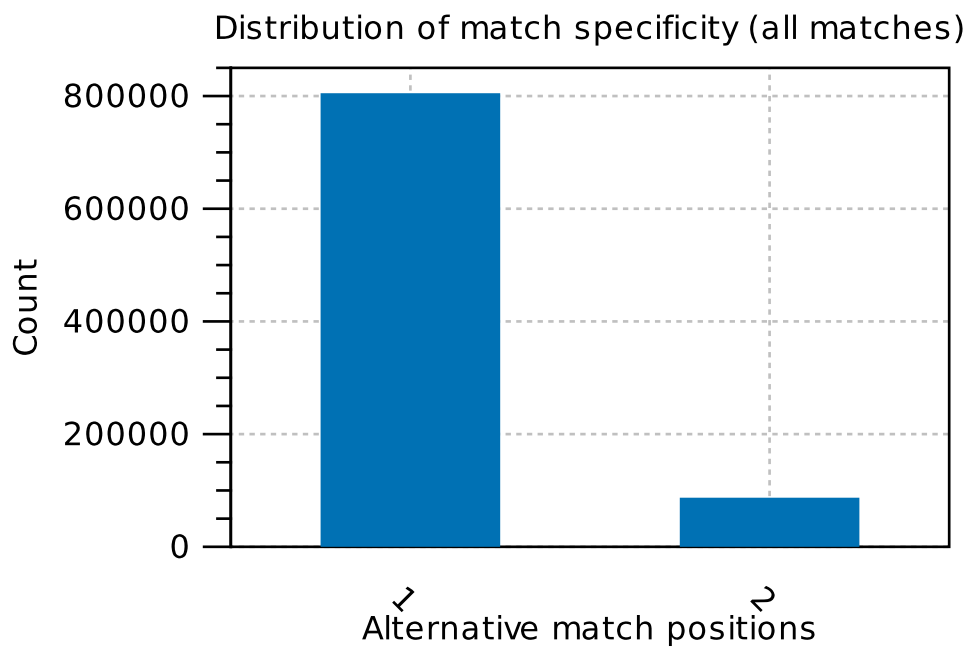

## Distribution of match specificity (non-specific matches)

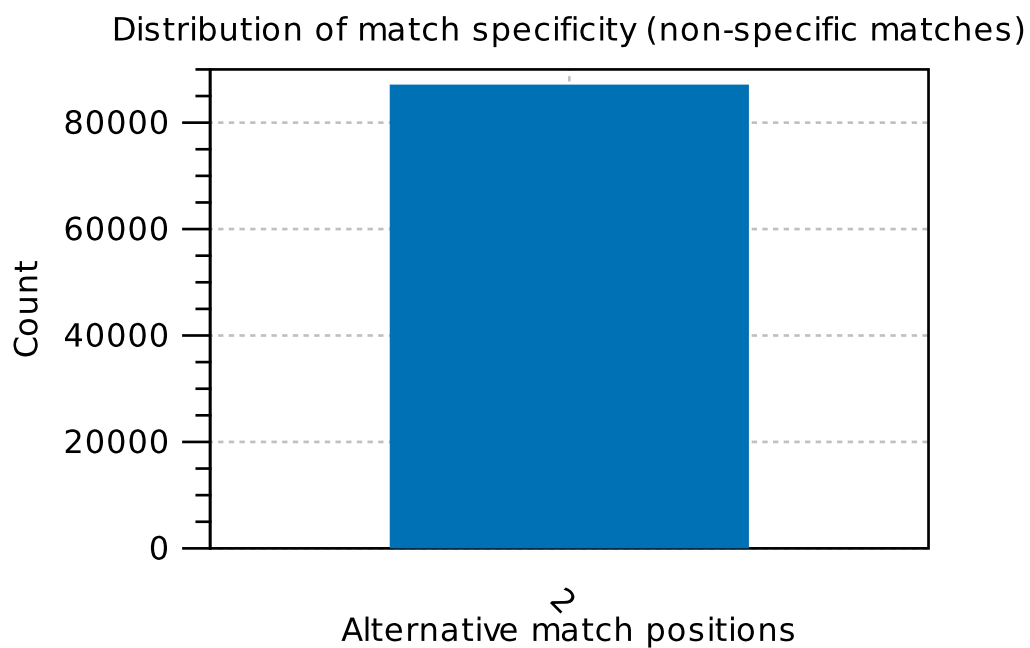

### 3.3 Non-perfect matches

#### *Non-perfect matches*

|                       |               |
|-----------------------|---------------|
| Read count            | 892,146       |
| % of all mapped reads | 100.00        |
| Mean read length      | 5,799.85      |
| Total read length     | 5,174,315,491 |



*Distribution of mismatches (all matches)*

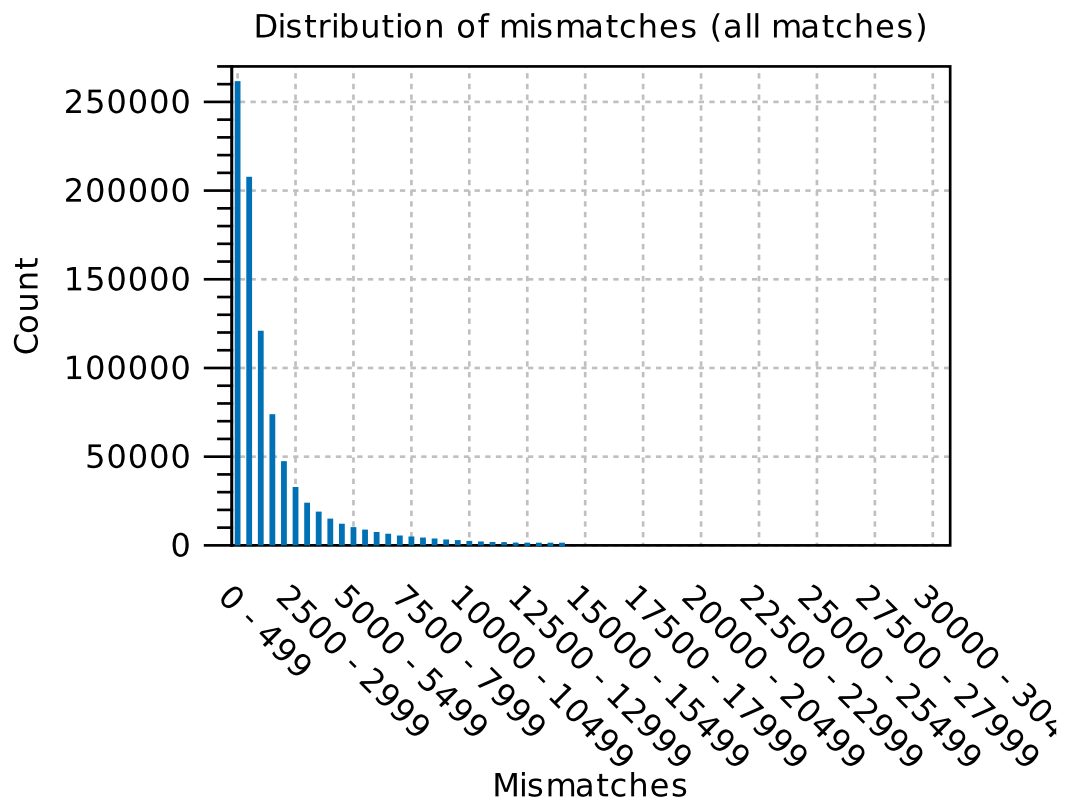

*Distribution of mismatches (non-perfect matches)*

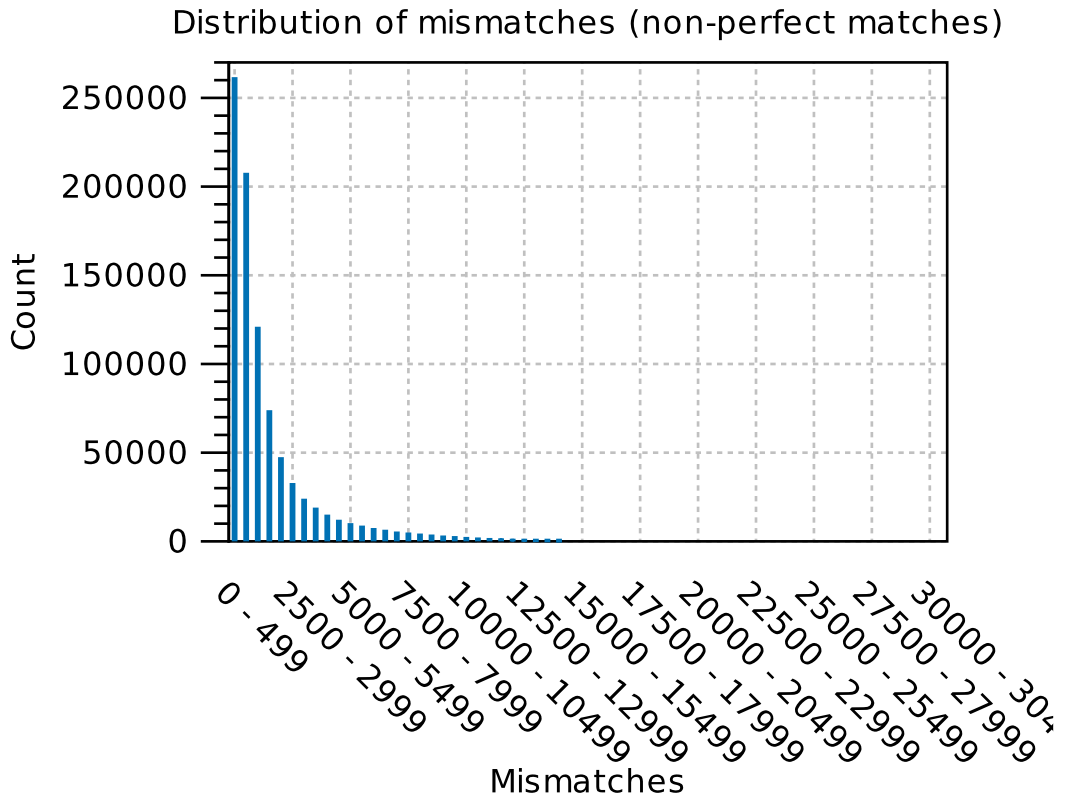

### 3.4 Read length distribution

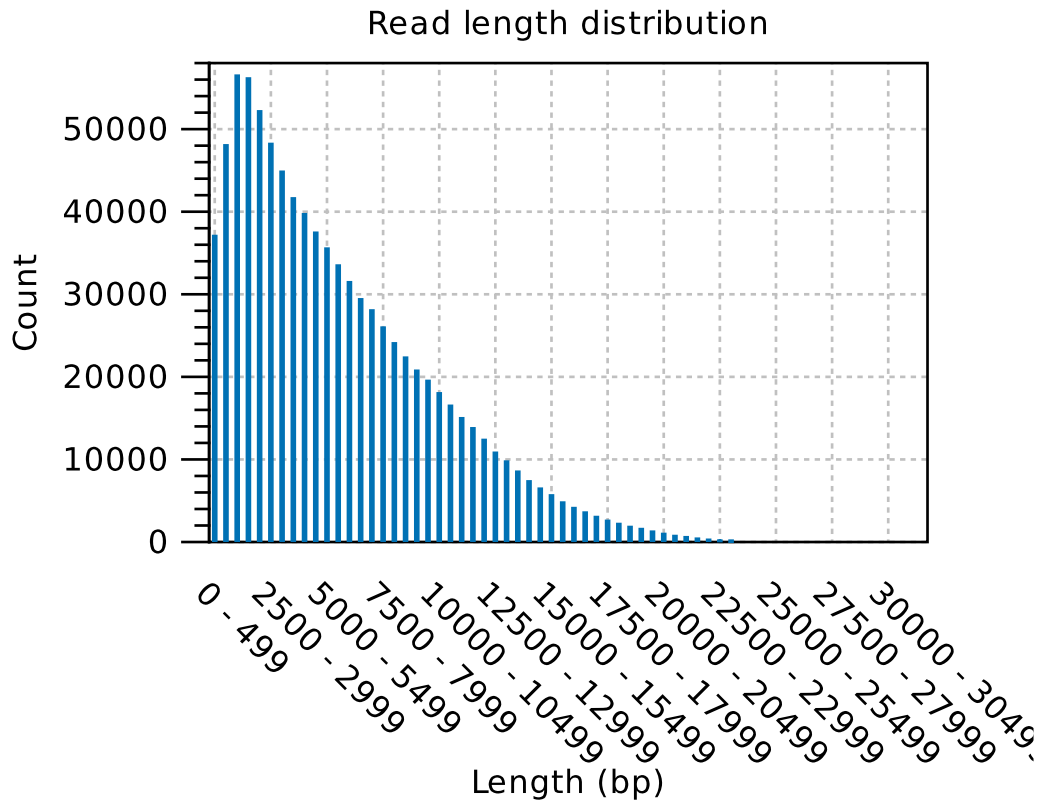

### 3.5 Insertion length distribution

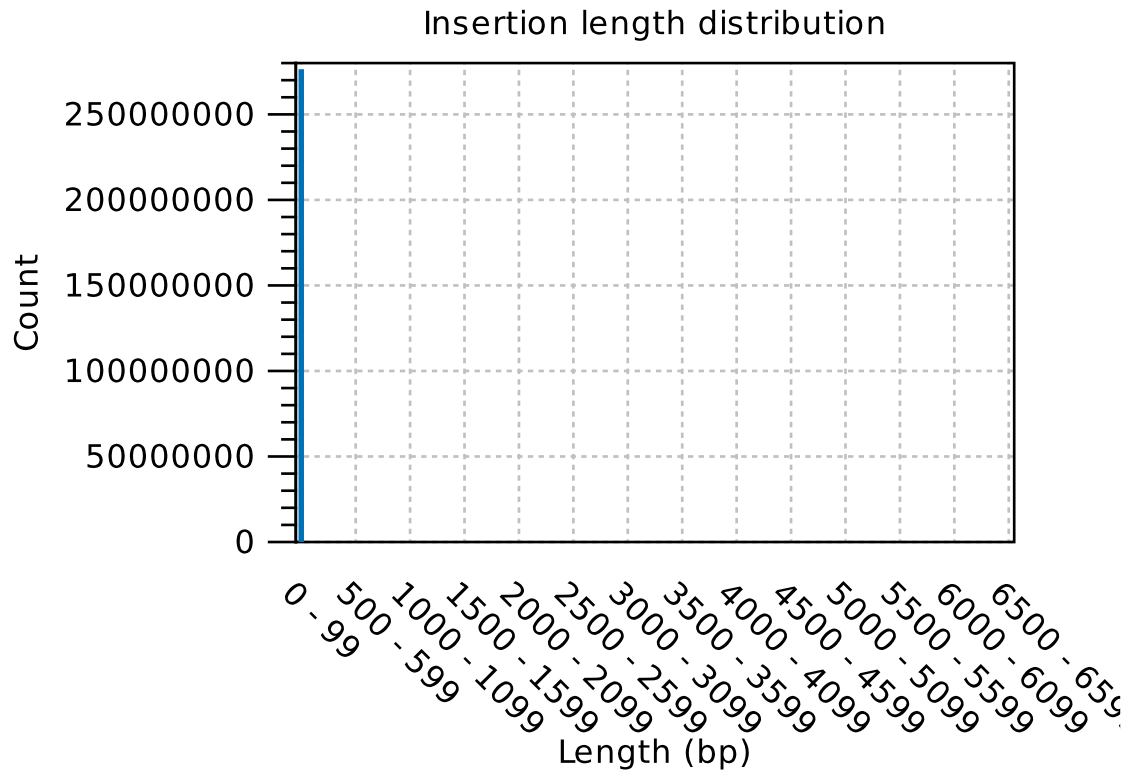

### 3.6 Deletion length distribution

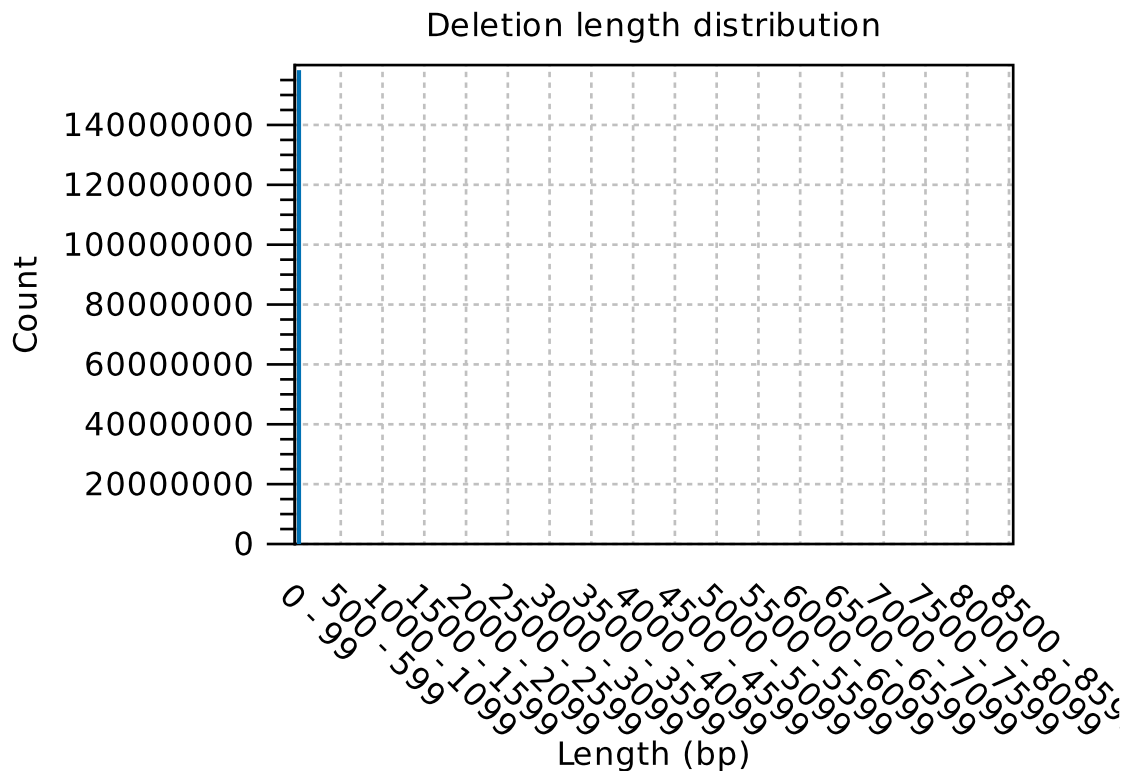

### 3.7 Nucleotide differences in reads relative to reference

| Nucleotide in reference | % read bases that differ |
|-------------------------|--------------------------|
| A                       | 7.17                     |
| C                       | 8.15                     |
| G                       | 8.04                     |
| T                       | 7.09                     |
| -                       | 0.93                     |
| Total                   | 1.47                     |

### 3.8 Nucleotide Mapping

#### Counts

|              |               |             |             |               |
|--------------|---------------|-------------|-------------|---------------|
| Reference: A | 1,202,144,018 | 7,759,241   | 7,953,231   | 6,563,728     |
| Reference: C | 5,941,656     | 689,013,261 | 4,026,505   | 5,668,535     |
| Reference: G | 5,483,486     | 3,825,558   | 687,209,514 | 6,169,006     |
| Reference: T | 6,514,541     | 7,678,559   | 8,036,654   | 1,211,970,081 |
| Reference: - | 101,516,930   | 107,320,946 | 111,431,706 | 103,650,238   |

|       |               |             |             |               |
|-------|---------------|-------------|-------------|---------------|
| Total | 1,321,600,631 | 815,597,565 | 818,657,610 | 1,334,021,588 |
|-------|---------------|-------------|-------------|---------------|

| Read: -        | Total          |
|----------------|----------------|
| 70,620,713     | 1,295,040,931  |
| 45,539,864     | 750,189,821    |
| 44,578,008     | 747,265,572    |
| 70,266,786     | 1,304,466,621  |
| 45,138,265,556 | 45,562,185,376 |
| 45,369,270,927 | 49,659,148,321 |

### Percentages

|              |      |      |      |      |
|--------------|------|------|------|------|
| Reference: A | 2.42 | 0.02 | 0.02 | 0.01 |
| Reference: C | 0.01 | 1.39 | 0.01 | 0.01 |
| Reference: G | 0.01 | 0.01 | 1.38 | 0.01 |
| Reference: T | 0.01 | 0.02 | 0.02 | 2.44 |
| Reference: - | 0.20 | 0.22 | 0.22 | 0.21 |
| Total        | 2.66 | 1.64 | 1.65 | 2.69 |

| Read: - | Total  |
|---------|--------|
| 0.14    | 2.61   |
| 0.09    | 1.51   |
| 0.09    | 1.50   |
| 0.14    | 2.63   |
| 90.90   | 91.75  |
| 91.36   | 100.00 |

## Relative errors (reference to read)

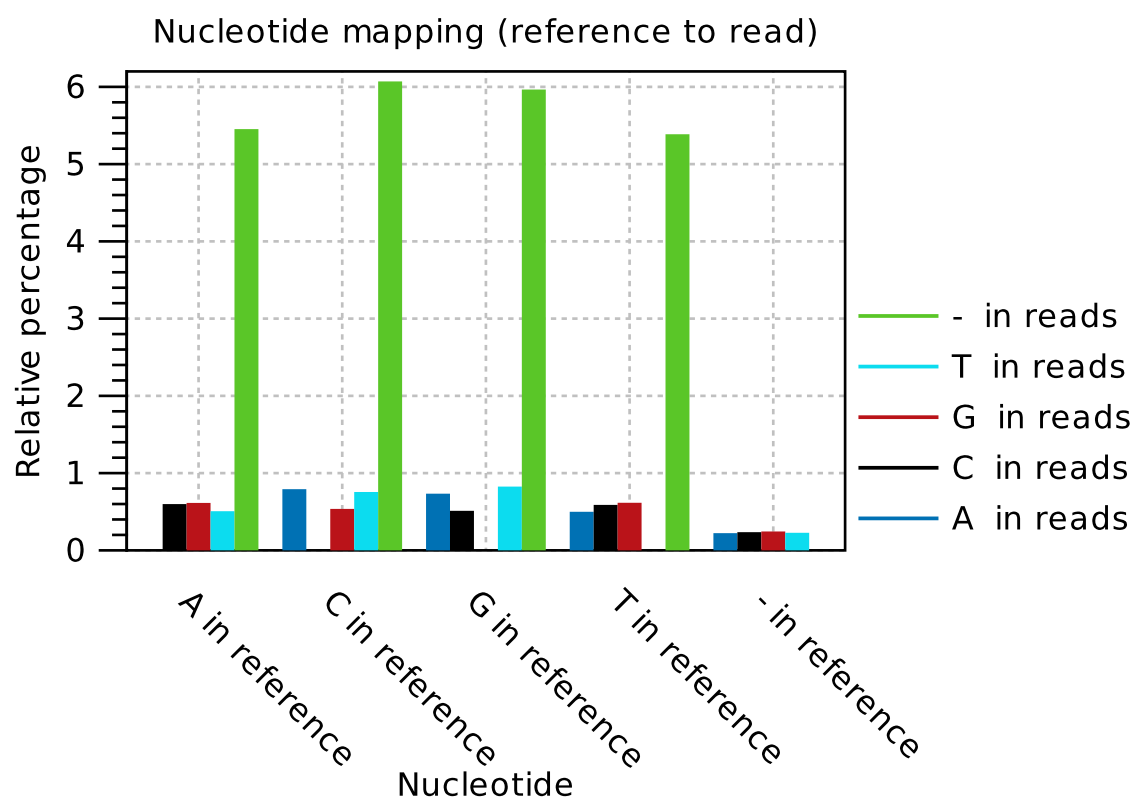

Bars depict off-diagonal element counts divided by counts in the column with header "total ".

*Error counts (reference to read)*

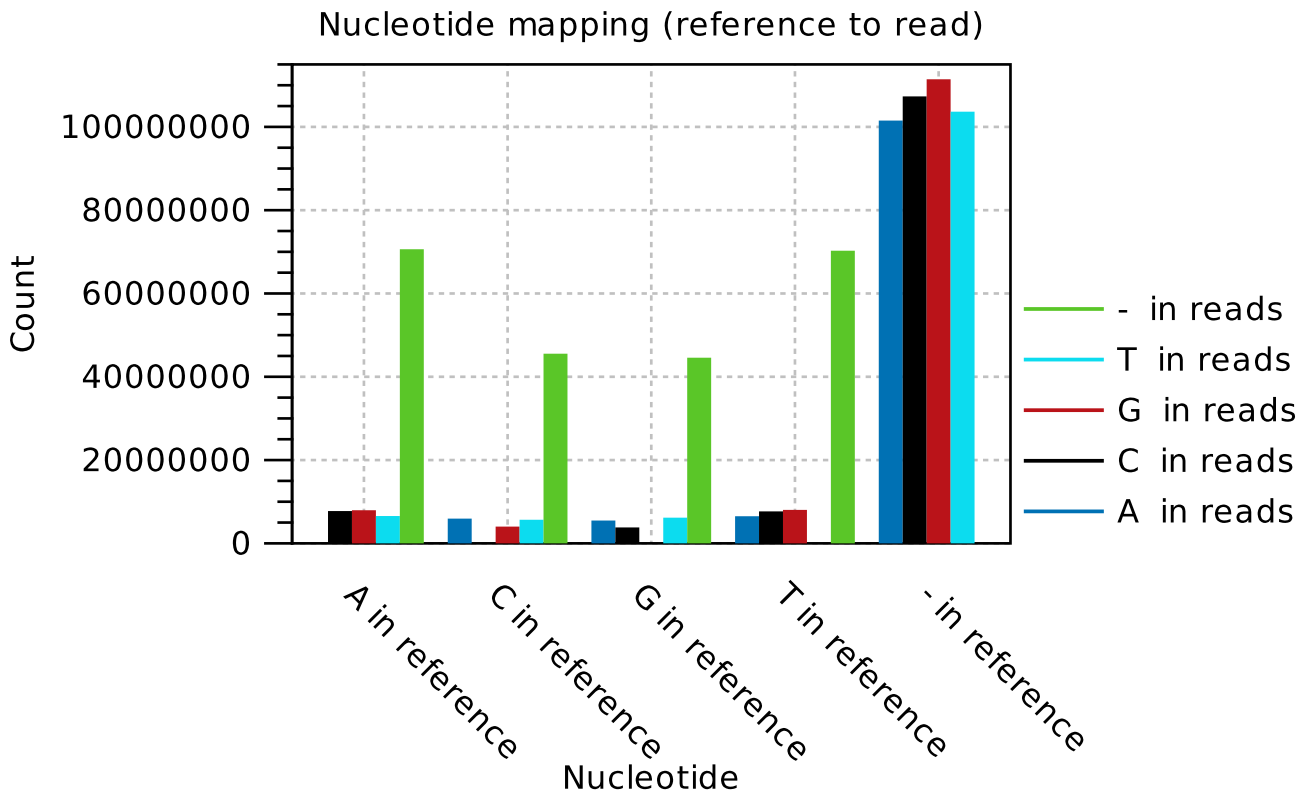

Bars depict off-diagonal element counts.

*Relative errors (read to reference)*

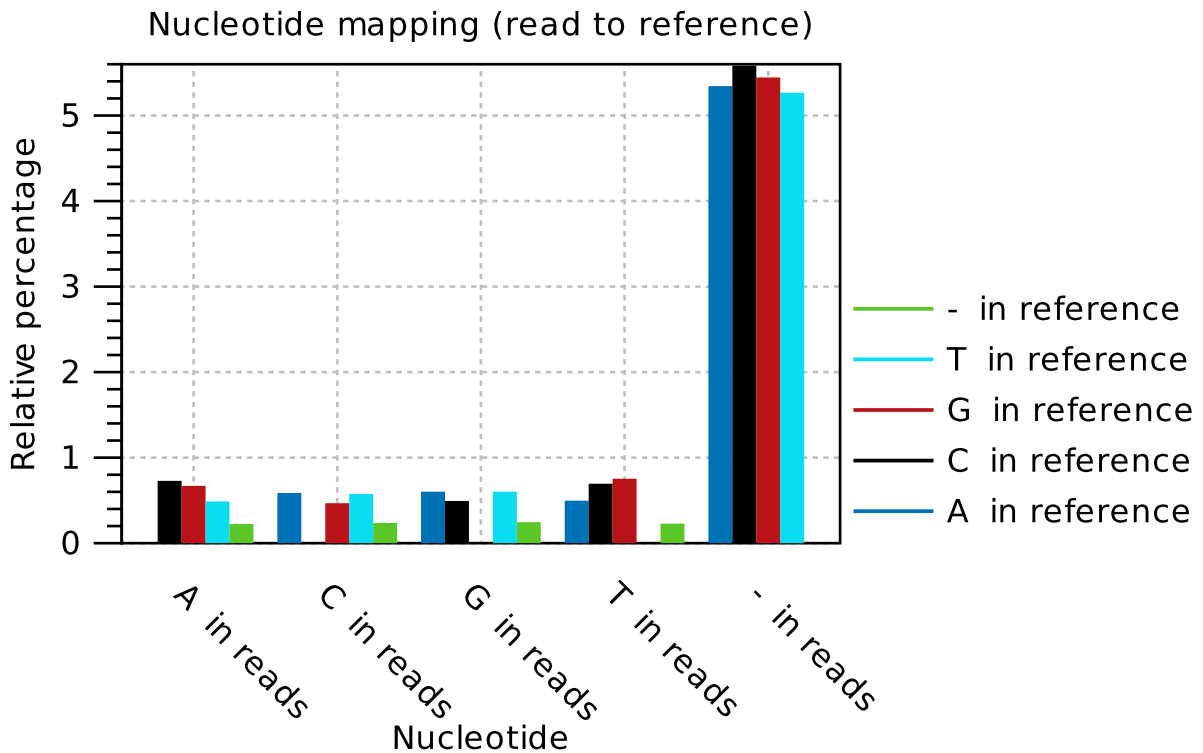



Bars depict off-diagonal element counts divided by counts in the row with header "total".

### Error counts (read to reference)

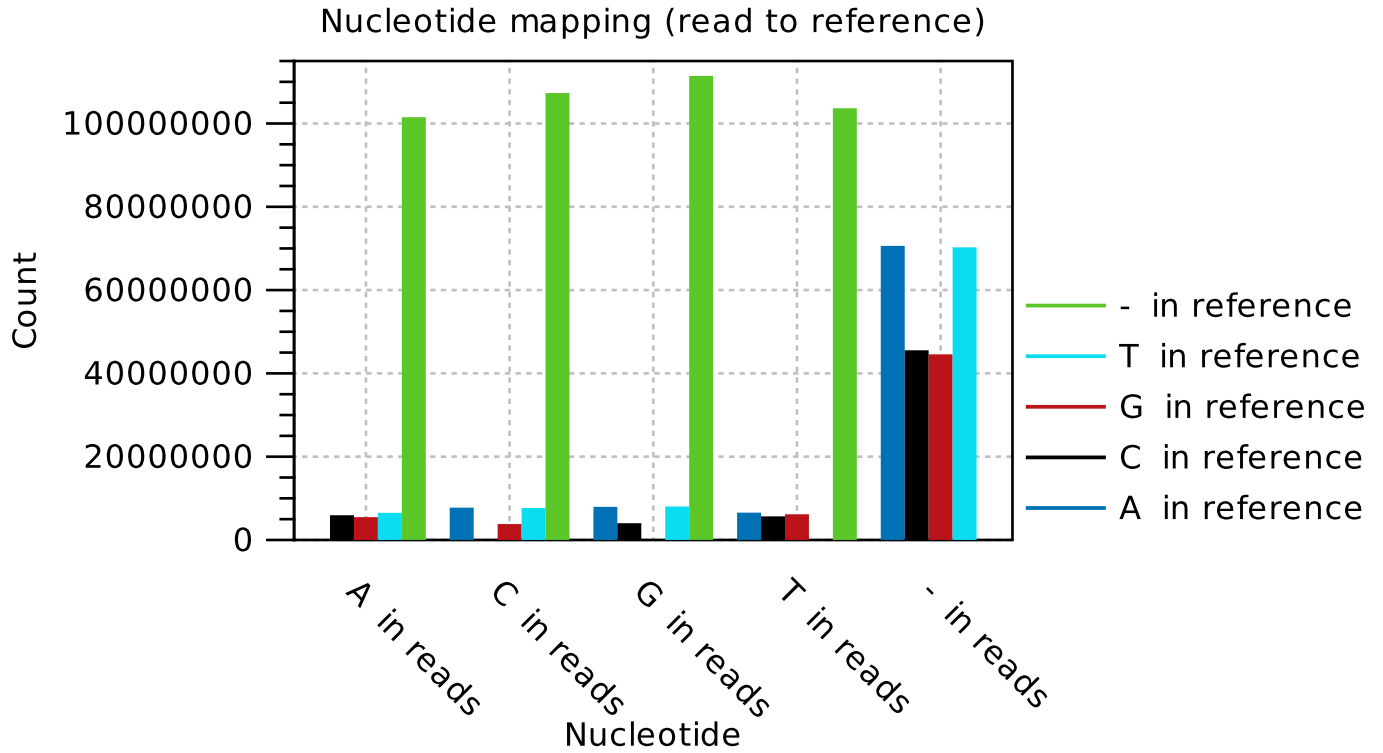

Bars depict off-diagonal element counts.

### 3.9 Quality for match distribution

There are no qualities.

### 3.10 Quality for mismatch distribution

There are no qualities.

### 3.11 Mismatch fraction per read position

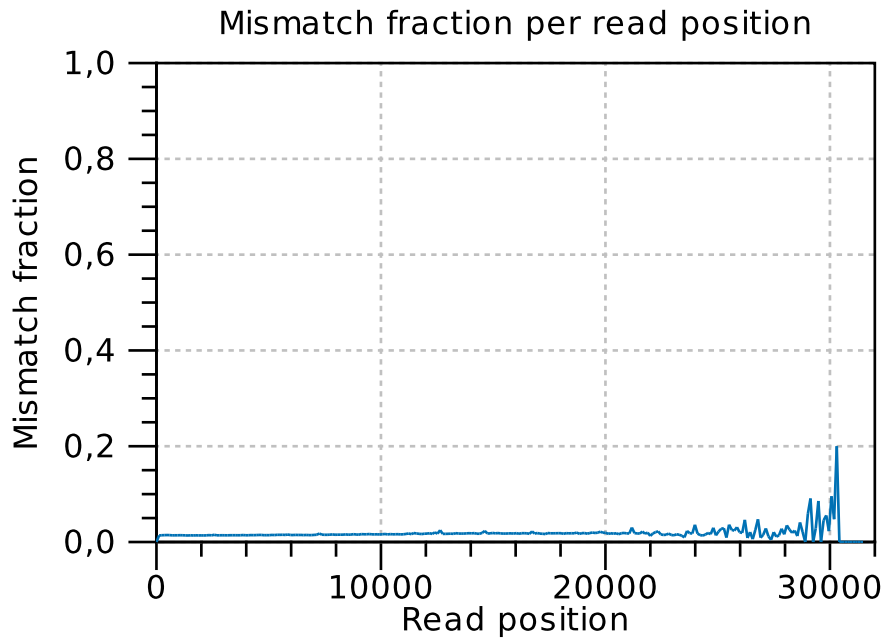

The plot displays the mismatch fraction per read position in the sequenced segments

### 3.12 Unaligned ends

|                                         |           |
|-----------------------------------------|-----------|
| Read count                              | 1,490,774 |
| % of all mapped reads                   | 167.10    |
| Positions covered                       | 1,167,914 |
| Positions covered in % of reference     | 0.98      |
| Positions covered in % of bases covered | 1.01      |

*Reads with one unaligned end*

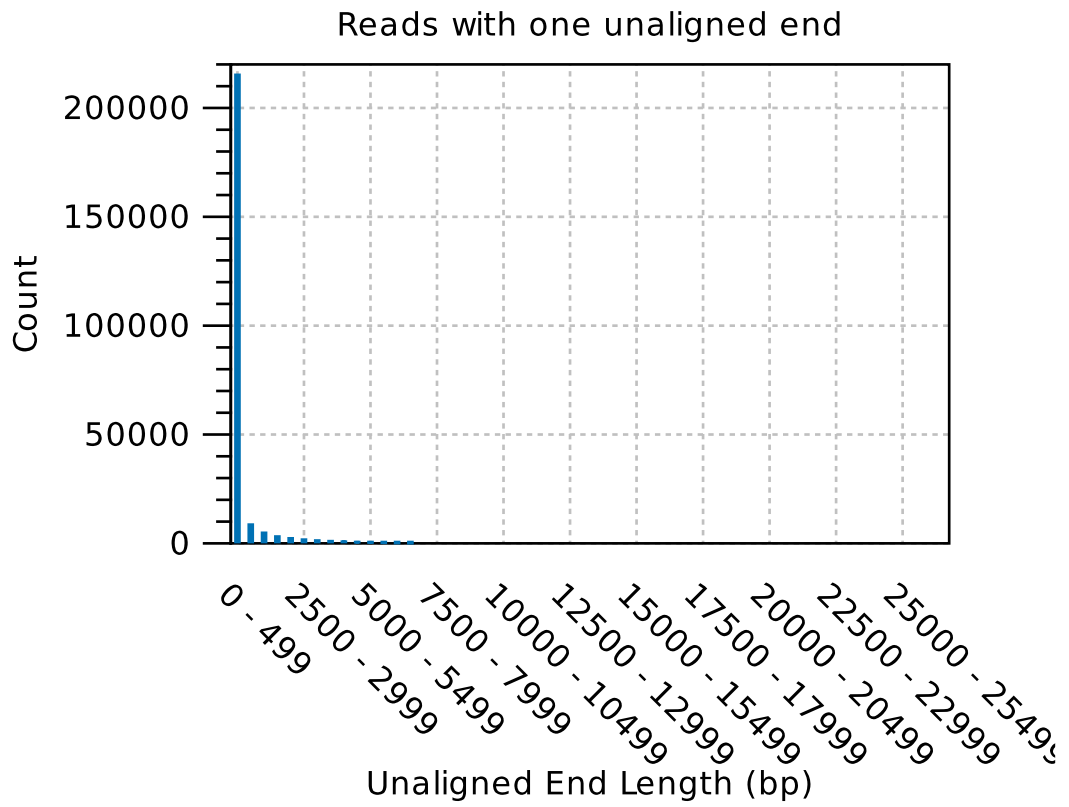

## Reads with two unaligned ends

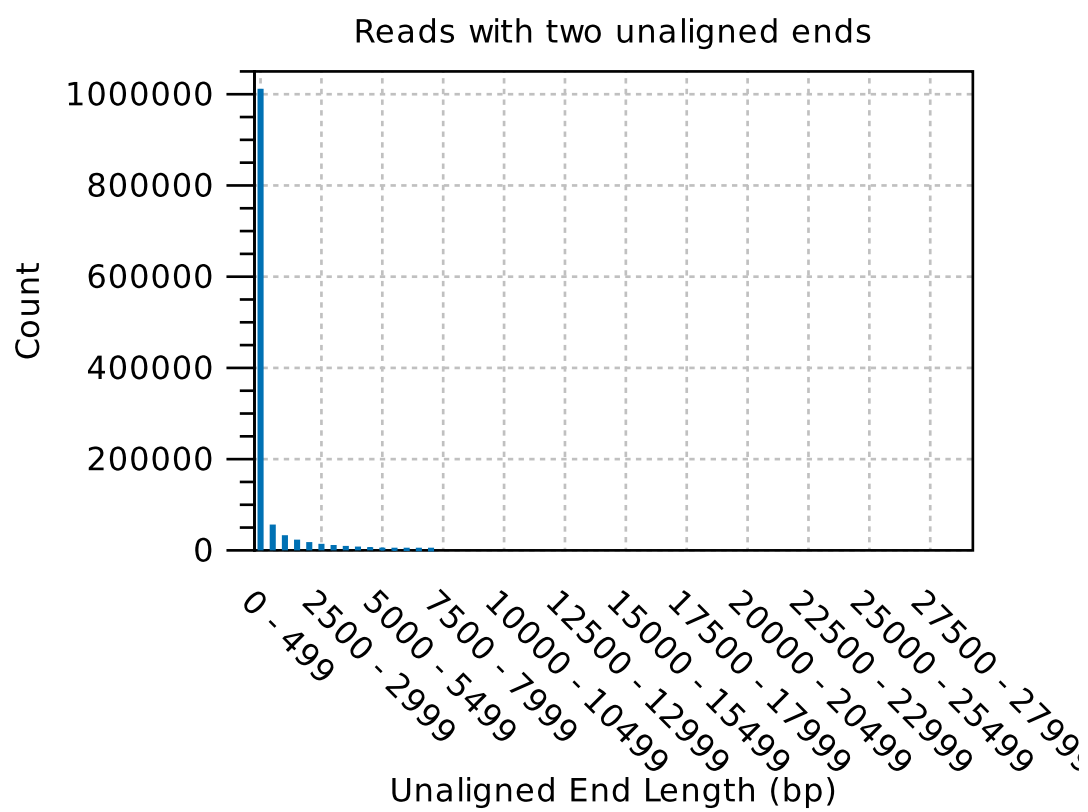

Supplement: 12864_2018_5164_MOESM2_ESM.pdf [file 12864_2018_5164_MOESM2_ESM.pdf]
