# Supplementary material for: Correcting palindromes in long reads after whole-genome amplification
Source: PubMed Central journal article supplement (PMC6218980; doi:10.1186/s12864-018-5164-1), 2018-11-06

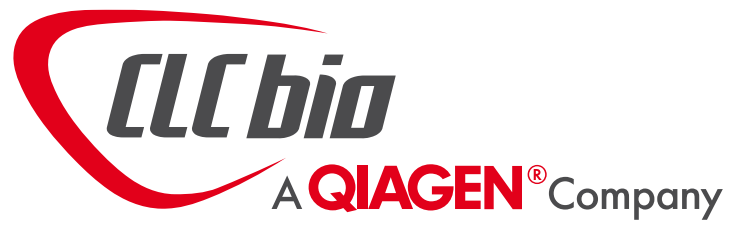

Mapping Report for ath.all.cleaned BLASR-mapping  
Type: Read mapping  
Reference count: 7  
Generated by: warri004  
Date: Thu Apr 21 15:57:13 CEST 2016  
Software: CLC Genomics Server 7.5.1

## Table of contents

|                                                                     |    |
|---------------------------------------------------------------------|----|
| 1. Summary .....                                                    | 3  |
| 2. References .....                                                 | 3  |
| 2.1 Reference coverage .....                                        | 3  |
| 2.2 Coverage statistics .....                                       | 3  |
| 2.3 Coverage level distribution .....                               | 4  |
| 2.4 Coverage level distribution (excl. zero coverage regions) ..... | 5  |
| 2.5 Zero coverage regions .....                                     | 6  |
| 2.6 Coverage vs GC Content Plot .....                               | 6  |
| 3. Mapped reads .....                                               | 6  |
| 3.1 All mapped reads .....                                          | 6  |
| 3.2 Non-specific matches .....                                      | 7  |
| 3.3 Non-perfect matches .....                                       | 8  |
| 3.4 Read length distribution .....                                  | 11 |
| 3.5 Insertion length distribution .....                             | 12 |
| 3.6 Deletion length distribution .....                              | 13 |
| 3.7 Nucleotide differences in reads relative to reference .....     | 13 |
| 3.8 Nucleotide Mapping .....                                        | 13 |
| 3.9 Quality for match distribution .....                            | 17 |
| 3.10 Quality for mismatch distribution .....                        | 17 |
| 3.11 Mismatch fraction per read position .....                      | 18 |
| 3.12 Unaligned ends .....                                           | 18 |

# 1. Summary

|                        |               |
|------------------------|---------------|
| Reference count        | 7             |
| Type                   | Read mapping  |
| Total reference length | 119,667,750   |
| GC contents in %       | 36.00         |
| Total read count       | 1,625,293     |
| Mean read length       | 4,689.63      |
| Total read length      | 7,622,015,789 |

# 2. References

## 2.1 Reference coverage

|                               |             |
|-------------------------------|-------------|
| Total reference length        | 119,667,750 |
| % GC                          | 36.00       |
| Total consensus length        | -           |
| Fraction of reference covered | 1.00        |

## 2.2 Coverage statistics

|                                                |             |
|------------------------------------------------|-------------|
| Total reference length                         | 119,667,750 |
| Minimum coverage                               | 0           |
| Maximum coverage                               | 12,626      |
| Average coverage                               | 55.05       |
| Standard deviation                             | 185.62      |
| Minimum excl. zero coverage regions            | 1           |
| Average excl. zero coverage regions            | 55.16       |
| Standard deviation excl. zero coverage regions | 185.80      |

## 2.3 Coverage level distribution

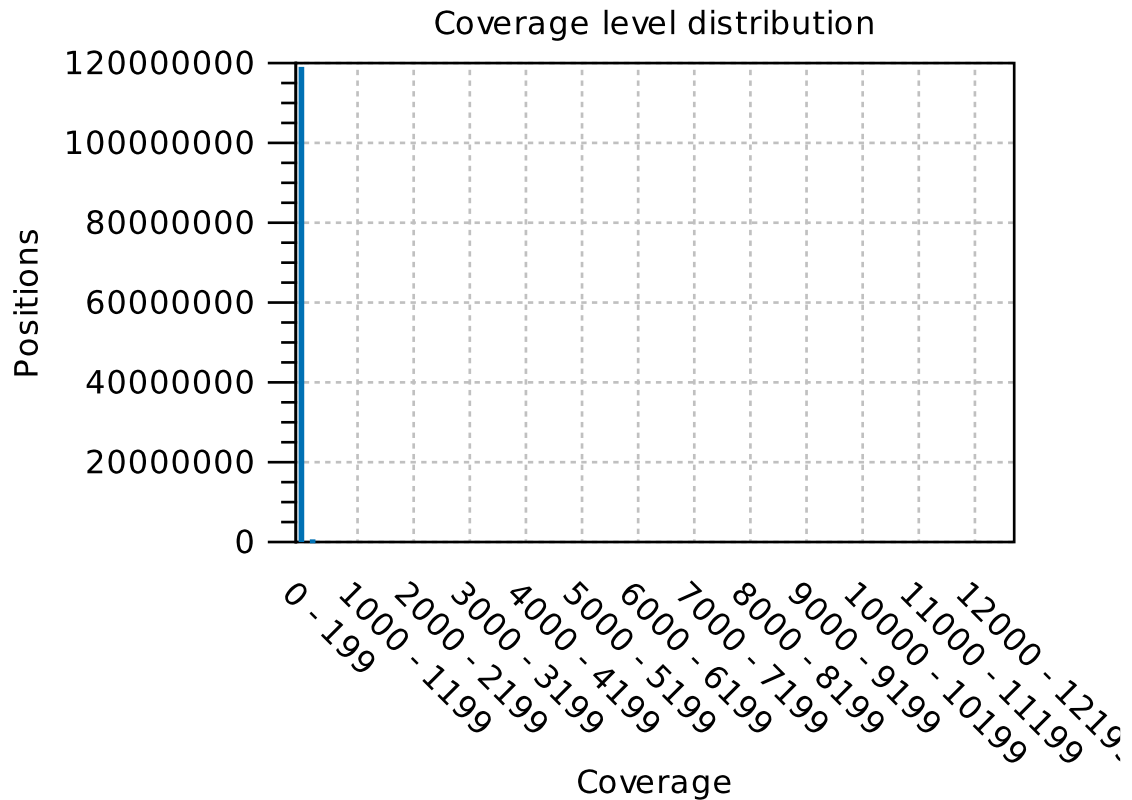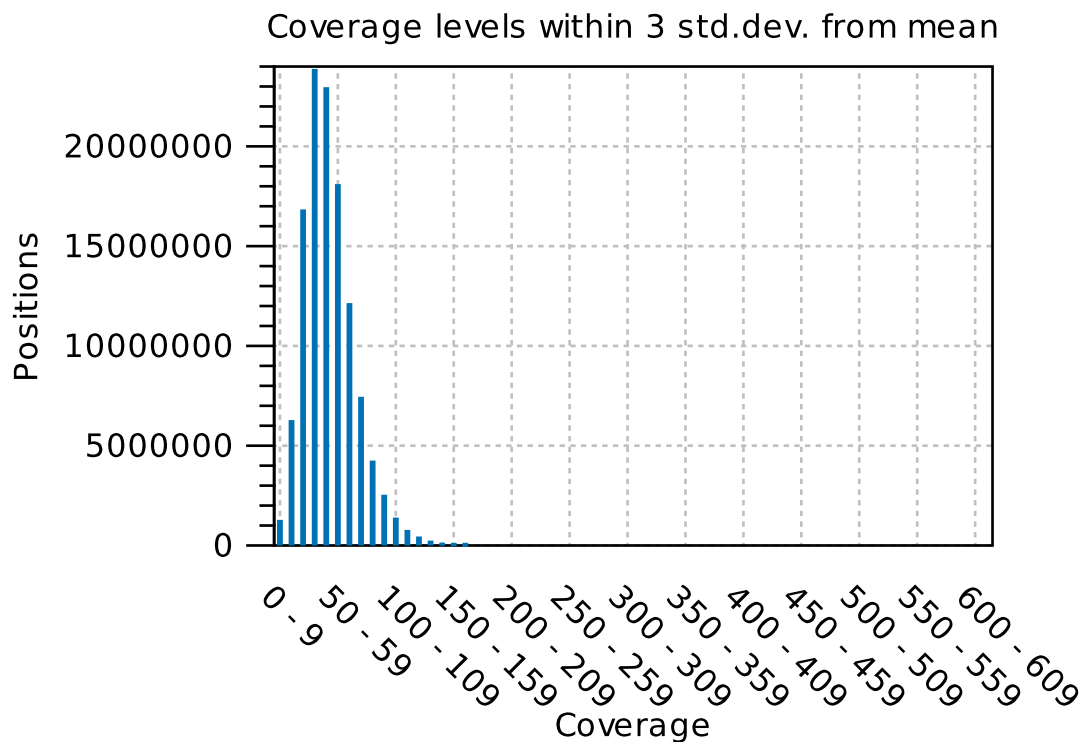

119,452,501 positions have coverage between 0 and 611.  
215,249 positions have coverage above 611 (not shown in graph).

## 2.4 Coverage level distribution (excl. zero coverage regions)

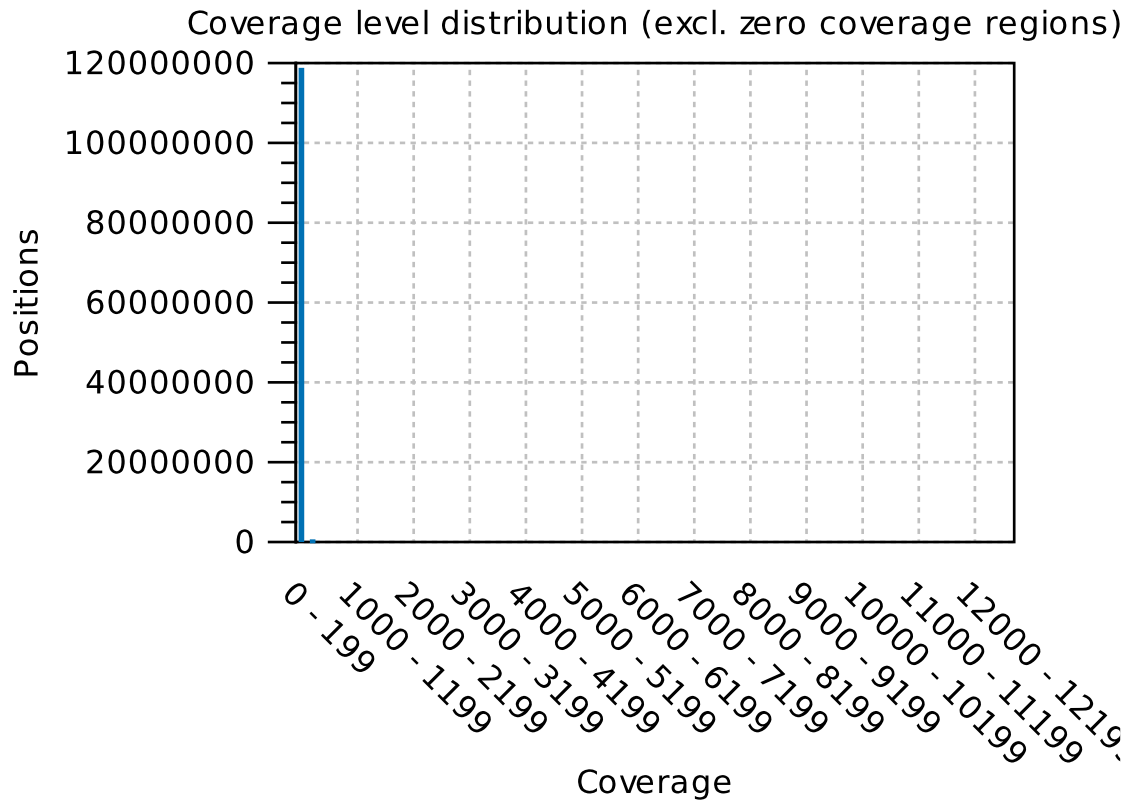

239,005 positions have zero coverage (not shown in graph).

Coverage levels within 3 std.dev. from mean (excl. zero coverage)

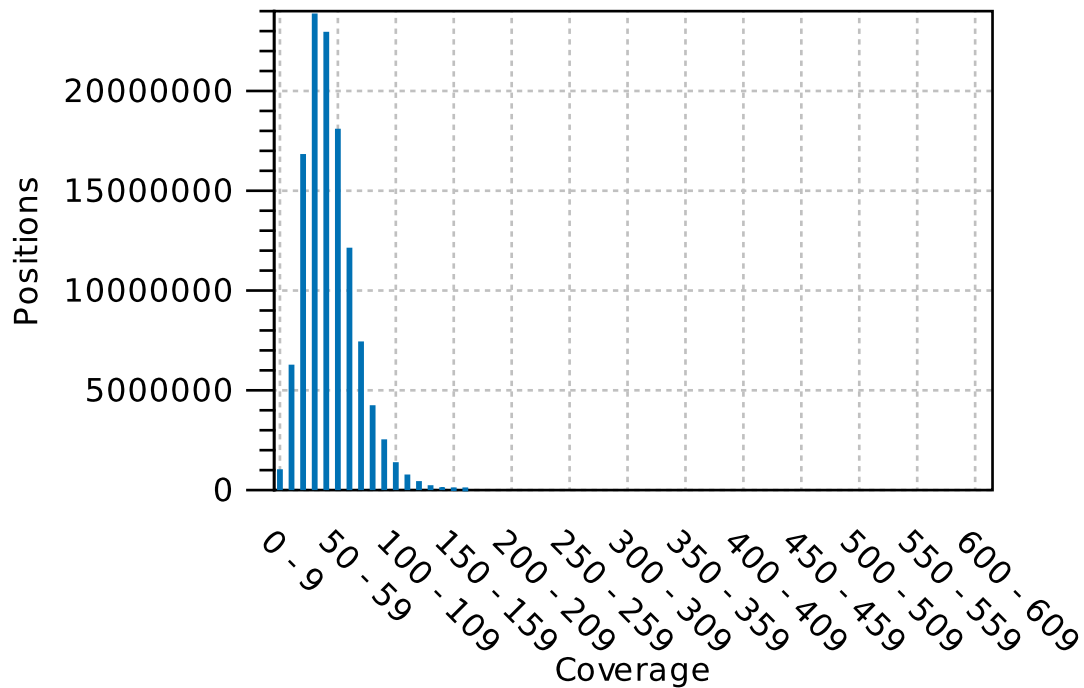

239,005 positions have coverage below 1 (not shown in graph).

119,213,536 positions have coverage between 1 and 612.

215,209 positions have coverage above 612 (not shown in graph).

## 2.5 Zero coverage regions

|                    |          |
|--------------------|----------|
| Count              | 350      |
| Minimum length     | 1        |
| Maximum length     | 54,395   |
| Mean length        | 682.87   |
| Standard deviation | 4,597.82 |
| Total length       | 239,005  |

## 2.6 Coverage vs GC Content Plot

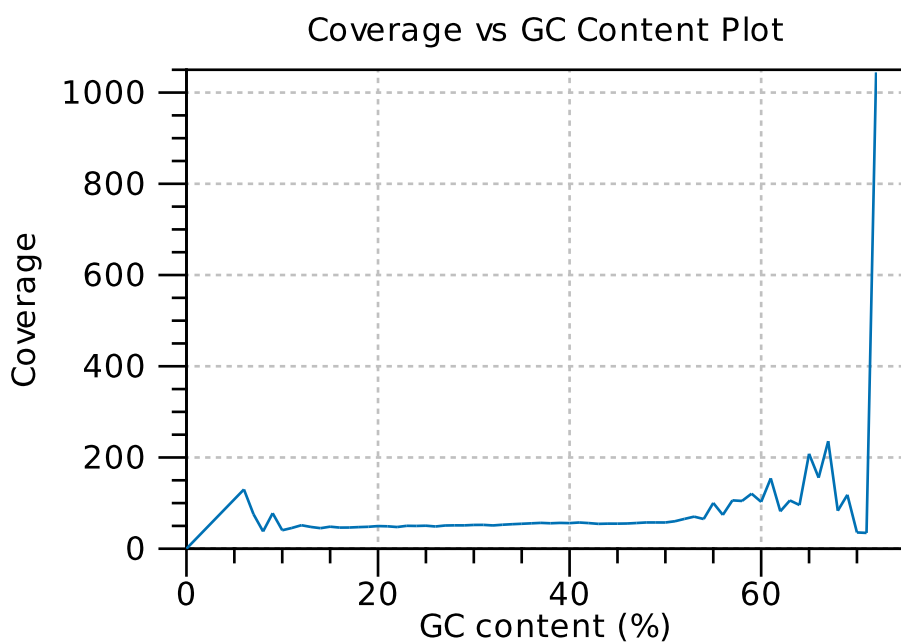

The plot displays, for each GC content level (0-100%), the mean read coverage of 100bp reference segments with that GC content.

## 3. Mapped reads

### 3.1 All mapped reads

|                   |               |
|-------------------|---------------|
| Read count        | 1,625,293     |
| Mean read length  | 4,689.63      |
| Total read length | 7,622,015,789 |

## 3.2 Non-specific matches

### *Non-specific matches*

|                       |             |
|-----------------------|-------------|
| Read count            | 57,972      |
| % of all mapped reads | 3.57        |
| Mean read length      | 5,009.90    |
| Total read length     | 290,433,796 |

### *Distribution of match specificity (all matches)*

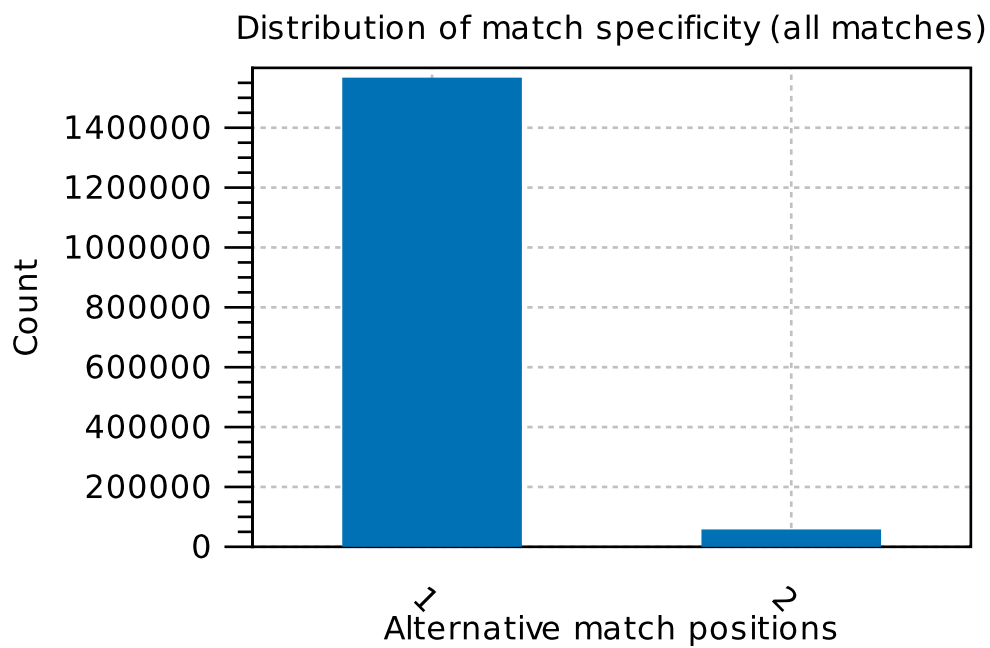

## Distribution of match specificity (non-specific matches)

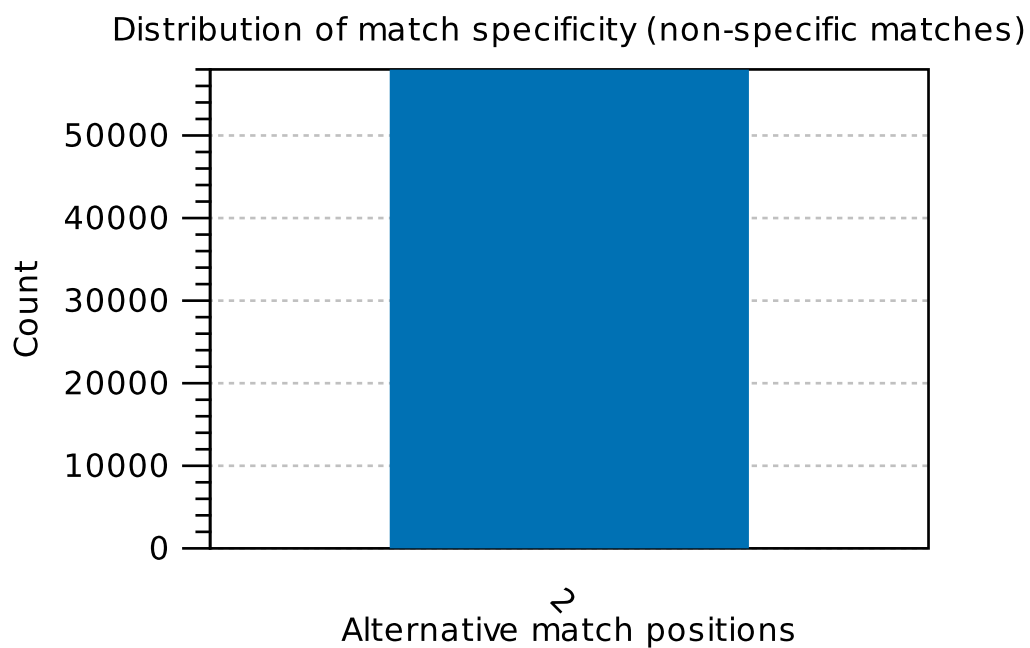

### 3.3 Non-perfect matches

#### *Non-perfect matches*

|                       |               |
|-----------------------|---------------|
| Read count            | 1,625,292     |
| % of all mapped reads | 100.00        |
| Mean read length      | 4,689.63      |
| Total read length     | 7,622,015,728 |



*Distribution of mismatches (all matches)*

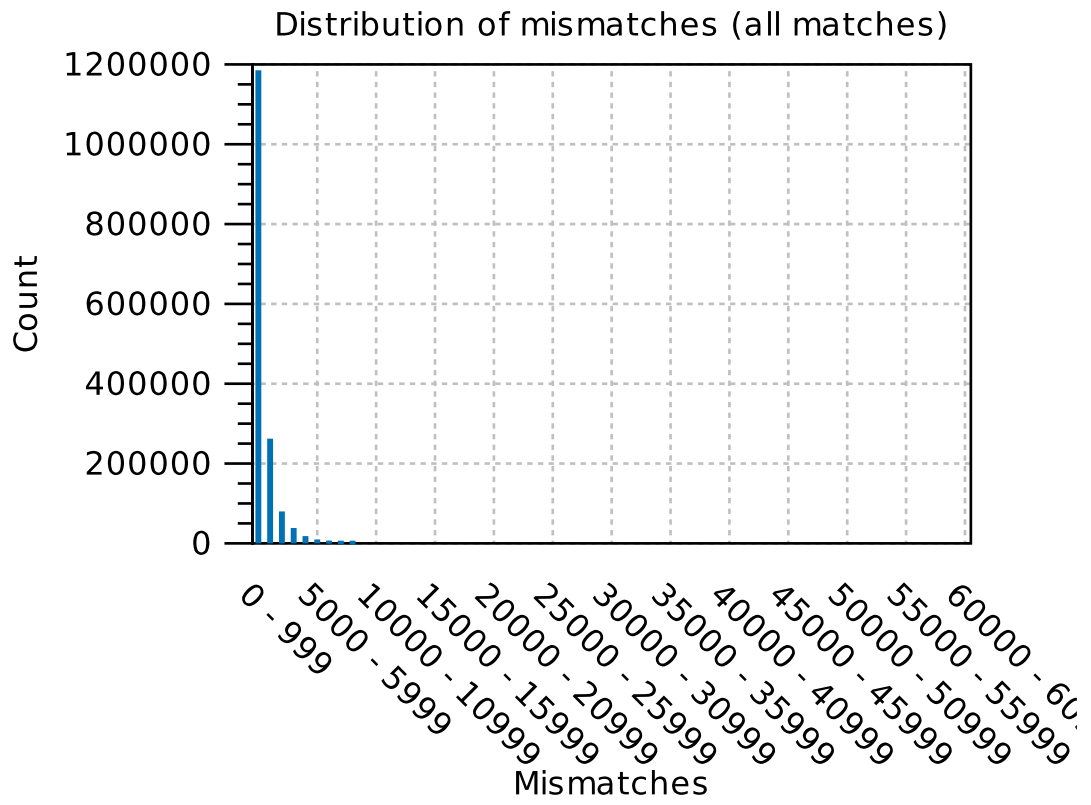

*Distribution of mismatches (non-perfect matches)*

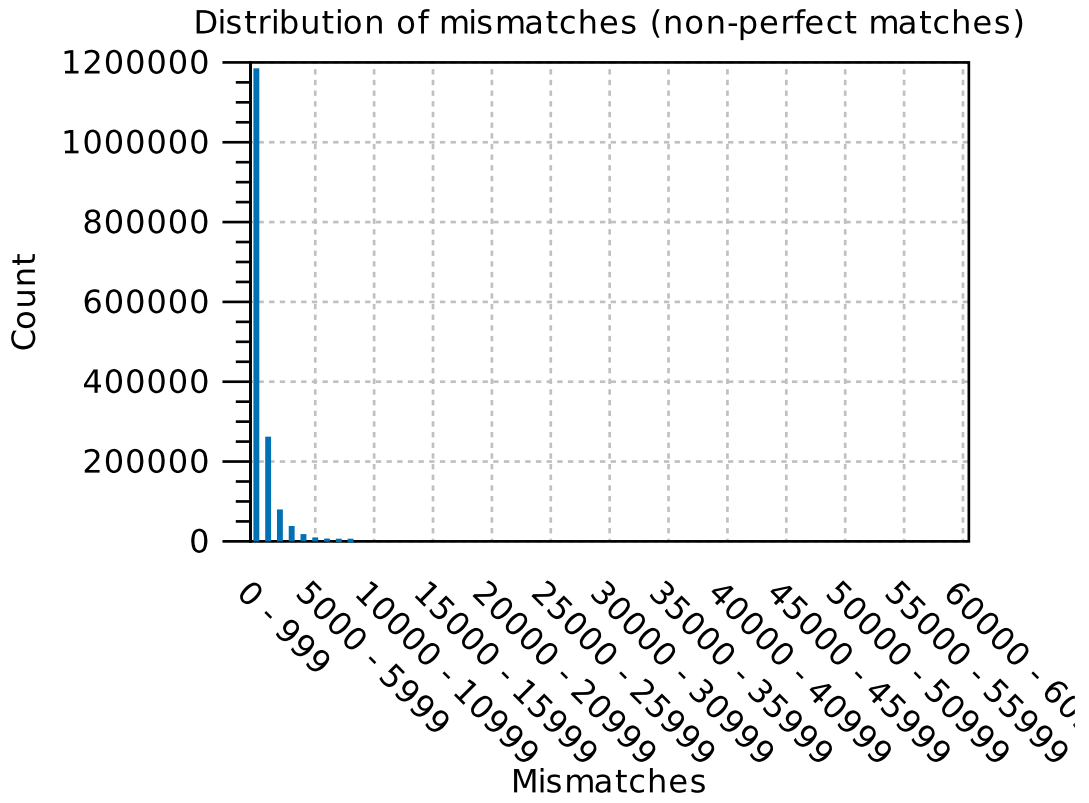

### 3.4 Read length distribution

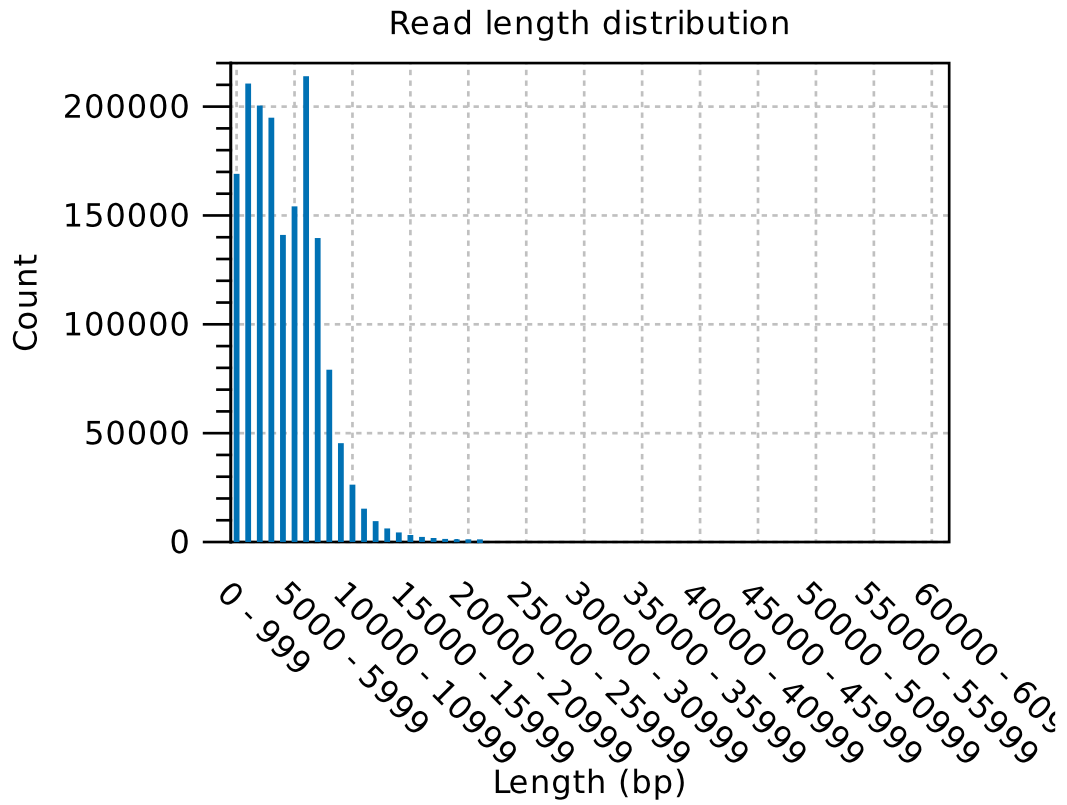

### 3.5 Insertion length distribution

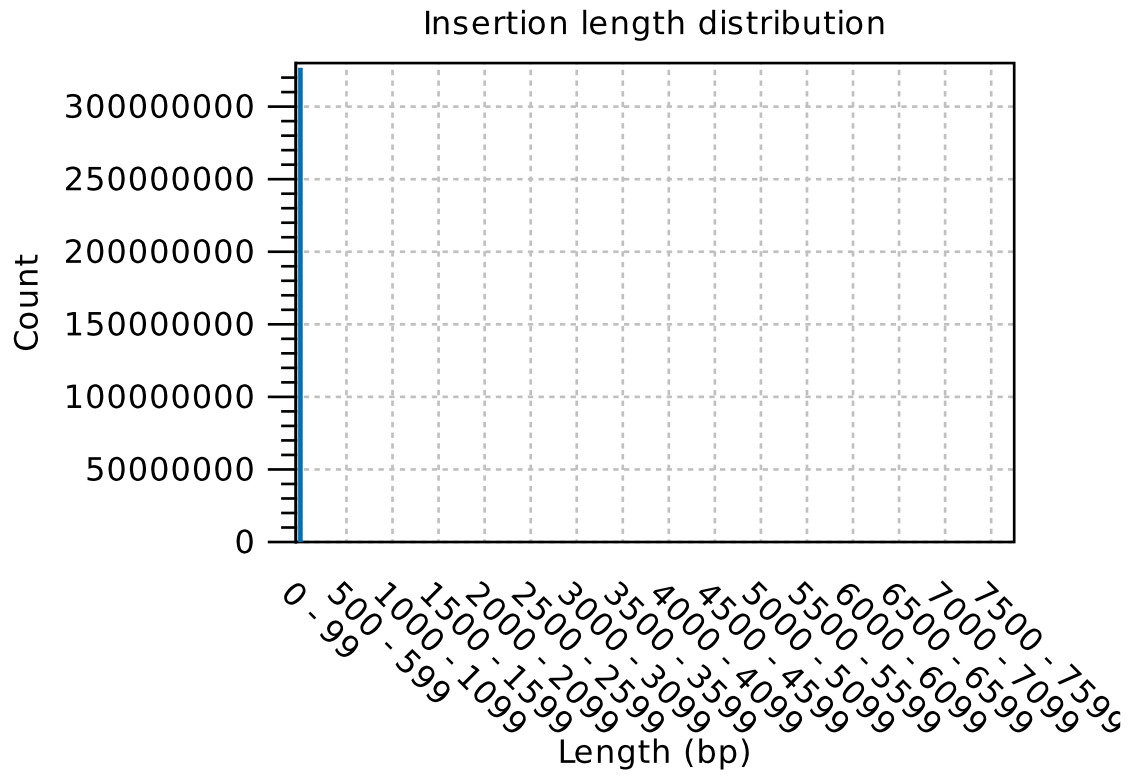

### 3.6 Deletion length distribution

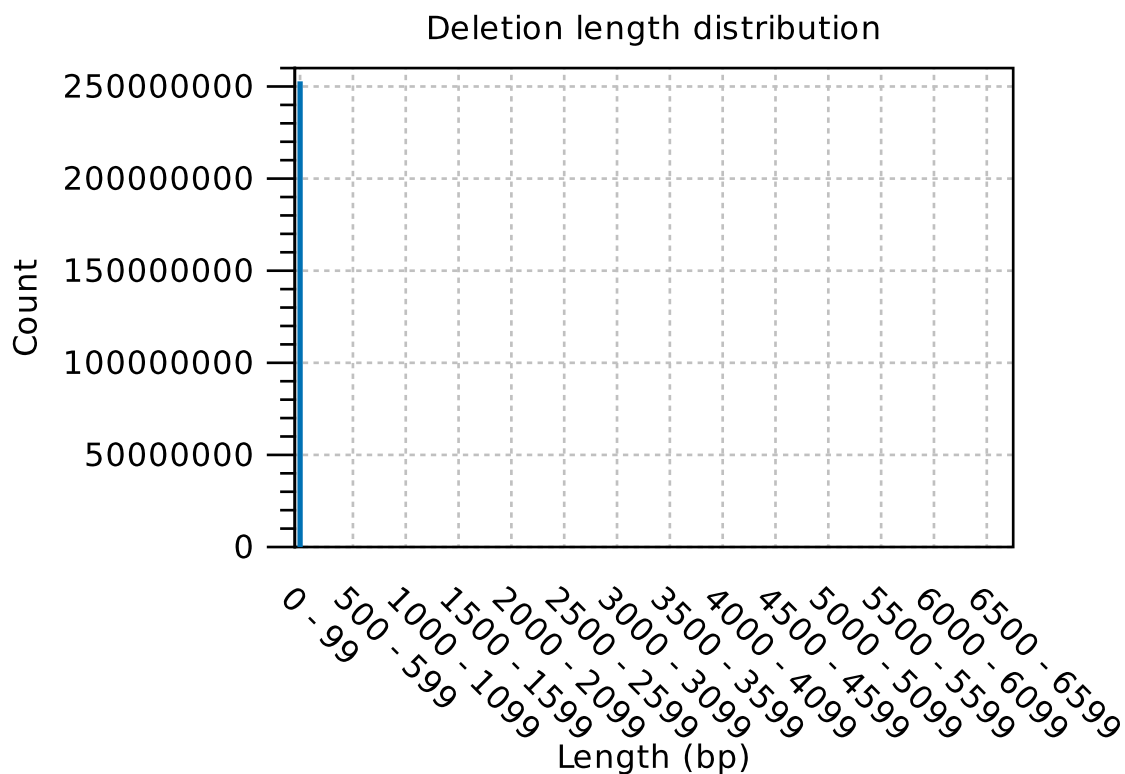

### 3.7 Nucleotide differences in reads relative to reference

| Nucleotide in reference | % read bases that differ |
|-------------------------|--------------------------|
| A                       | 5.14                     |
| C                       | 6.25                     |
| G                       | 6.34                     |
| T                       | 5.14                     |
| -                       | 1.43                     |
| Total                   | 2.16                     |

### 3.8 Nucleotide Mapping

#### Counts

|              |               |               |               |               |
|--------------|---------------|---------------|---------------|---------------|
| Reference: A | 1,975,712,470 | 6,948,852     | 4,738,593     | 6,783,385     |
| Reference: C | 7,177,666     | 1,133,537,666 | 3,086,381     | 4,850,486     |
| Reference: G | 4,890,629     | 3,116,773     | 1,135,544,899 | 7,394,222     |
| Reference: T | 6,816,517     | 4,701,095     | 7,031,103     | 1,976,436,386 |
| Reference: - | 130,202,251   | 86,369,132    | 86,253,001    | 130,415,861   |

|       |               |               |               |               |
|-------|---------------|---------------|---------------|---------------|
| Total | 2,124,799,533 | 1,234,673,518 | 1,236,653,977 | 2,125,880,340 |
|-------|---------------|---------------|---------------|---------------|

| Read: -        | Total          |
|----------------|----------------|
| 88,675,611     | 2,082,858,911  |
| 60,484,751     | 1,209,136,950  |
| 61,517,107     | 1,212,463,630  |
| 88,649,421     | 2,083,634,522  |
| 29,951,817,724 | 30,385,057,969 |
| 30,251,144,614 | 36,973,151,982 |

### Percentages

|              |      |      |      |      |
|--------------|------|------|------|------|
| Reference: A | 5.34 | 0.02 | 0.01 | 0.02 |
| Reference: C | 0.02 | 3.07 | 0.01 | 0.01 |
| Reference: G | 0.01 | 0.01 | 3.07 | 0.02 |
| Reference: T | 0.02 | 0.01 | 0.02 | 5.35 |
| Reference: - | 0.35 | 0.23 | 0.23 | 0.35 |
| Total        | 5.75 | 3.34 | 3.34 | 5.75 |

| Read: - | Total  |
|---------|--------|
| 0.24    | 5.63   |
| 0.16    | 3.27   |
| 0.17    | 3.28   |
| 0.24    | 5.64   |
| 81.01   | 82.18  |
| 81.82   | 100.00 |

## Relative errors (reference to read)

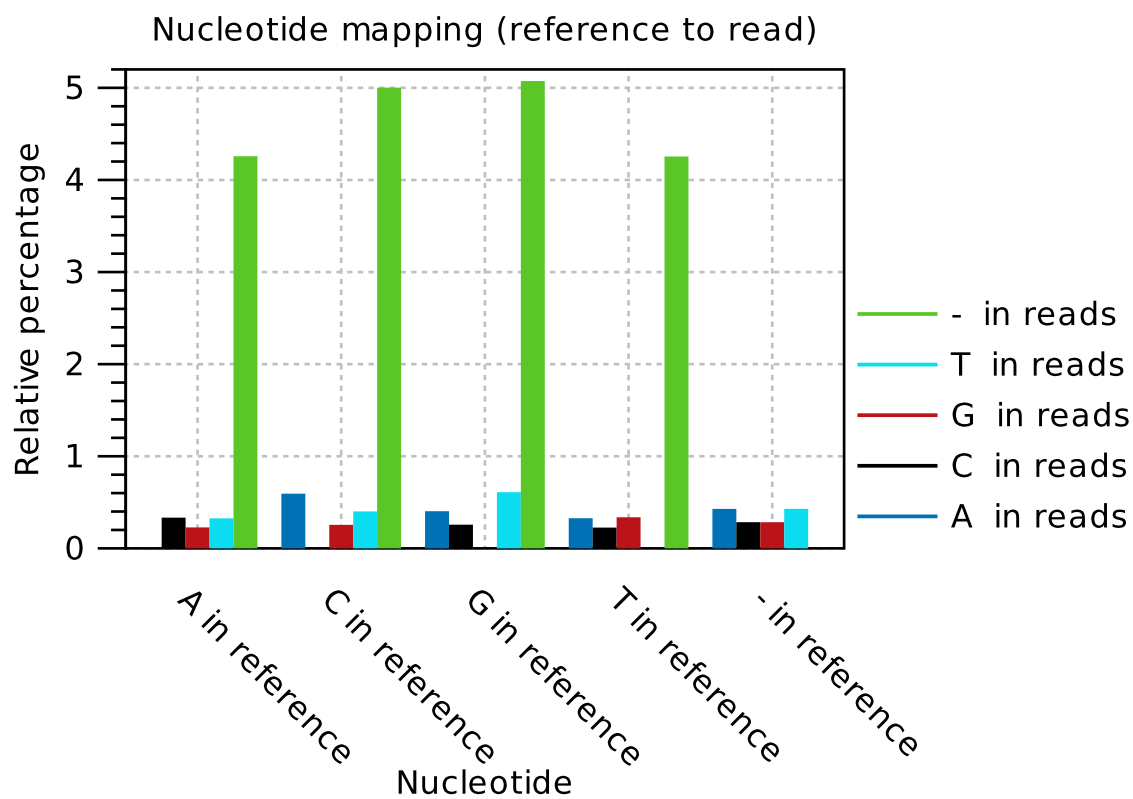

Bars depict off-diagonal element counts divided by counts in the column with header "total ".

*Error counts (reference to read)*

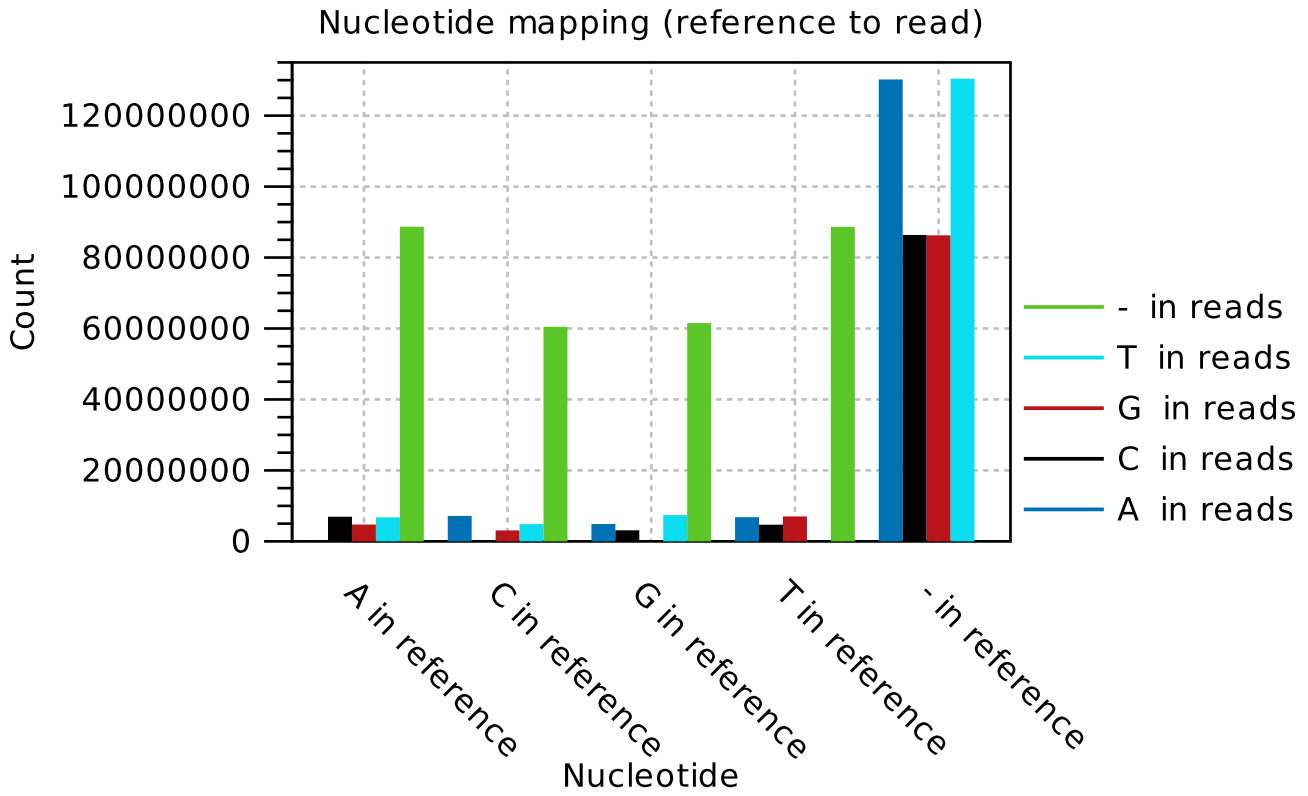

Bars depict off-diagonal element counts.

*Relative errors (read to reference)*

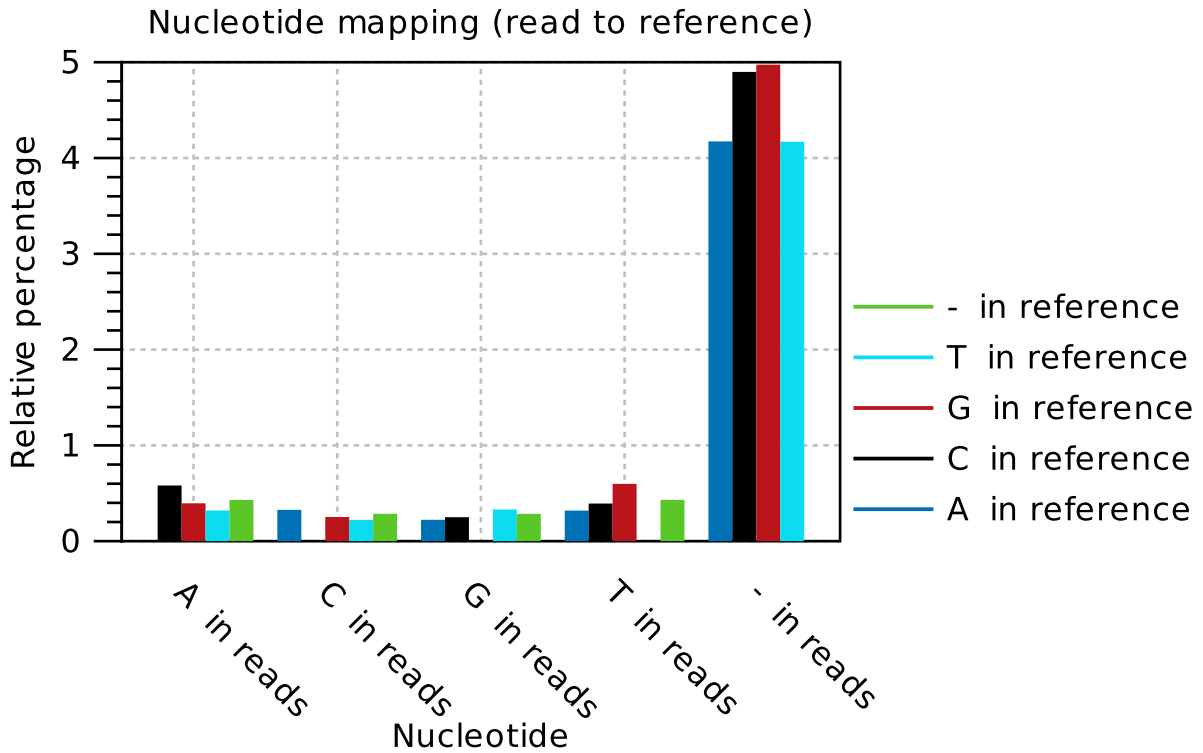



Bars depict off-diagonal element counts divided by counts in the row with header "total".

### Error counts (read to reference)

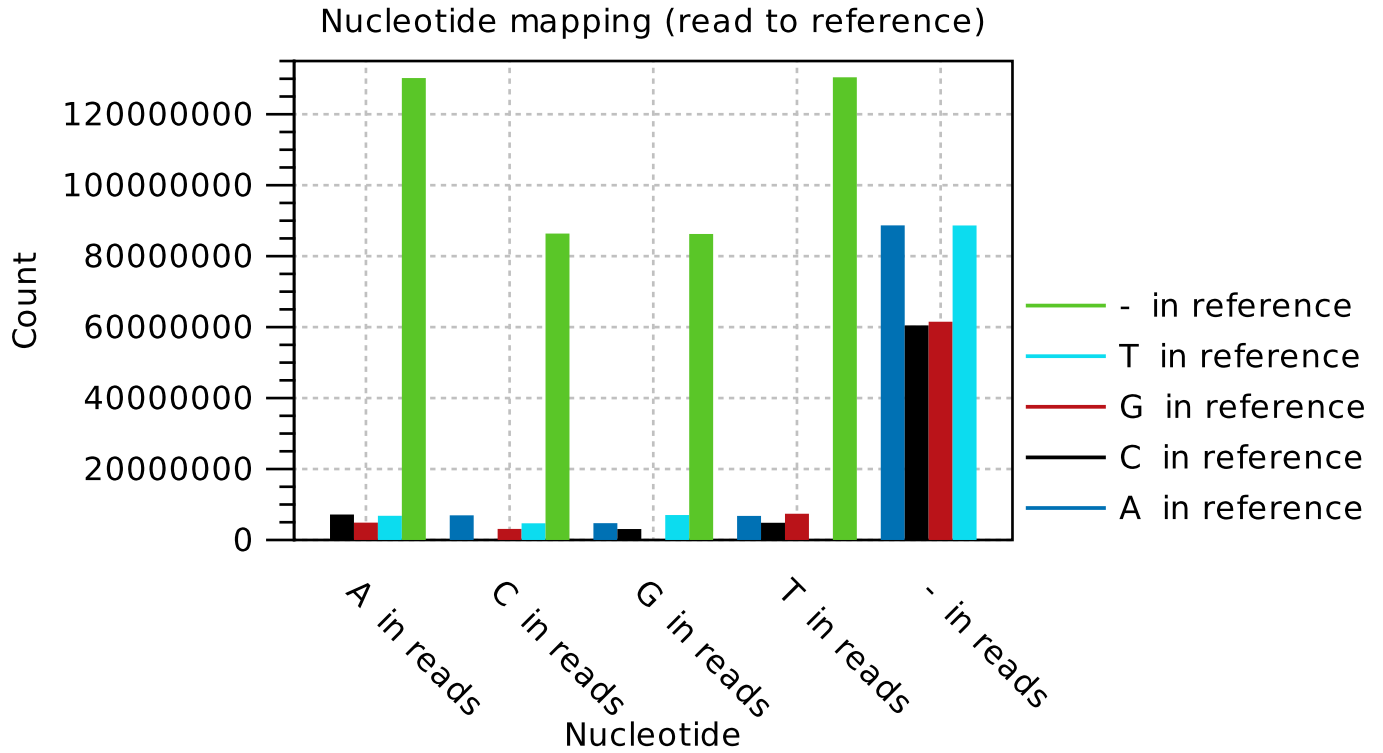

Bars depict off-diagonal element counts.

### 3.9 Quality for match distribution

There are no qualities.

### 3.10 Quality for mismatch distribution

There are no qualities.

### 3.11 Mismatch fraction per read position

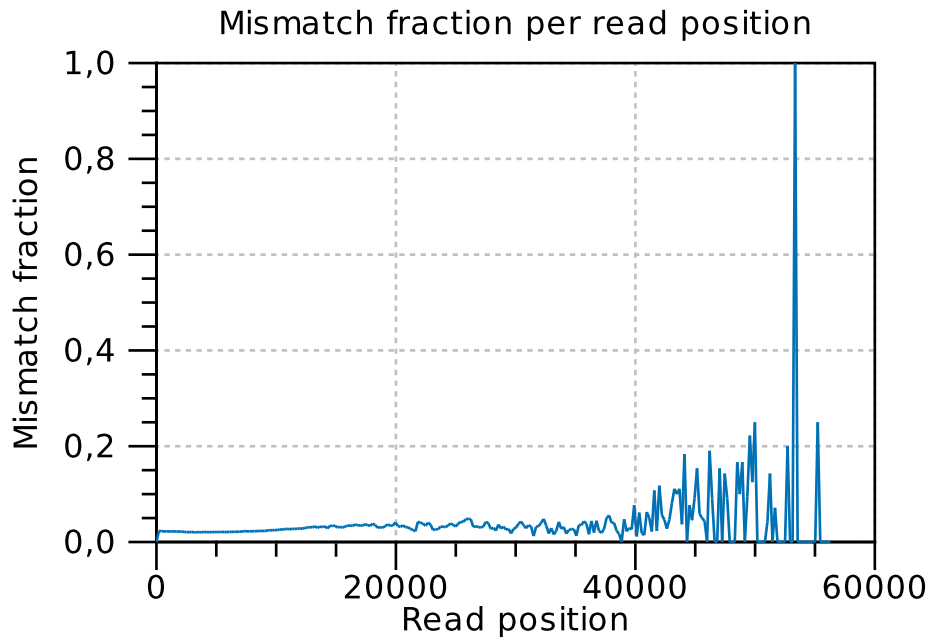

The plot displays the mismatch fraction per read position in the sequenced segments

### 3.12 Unaligned ends

|                                         |           |
|-----------------------------------------|-----------|
| Read count                              | 2,254,744 |
| % of all mapped reads                   | 138.73    |
| Positions covered                       | 1,965,677 |
| Positions covered in % of reference     | 1.64      |
| Positions covered in % of bases covered | 1.65      |

*Reads with one unaligned end*

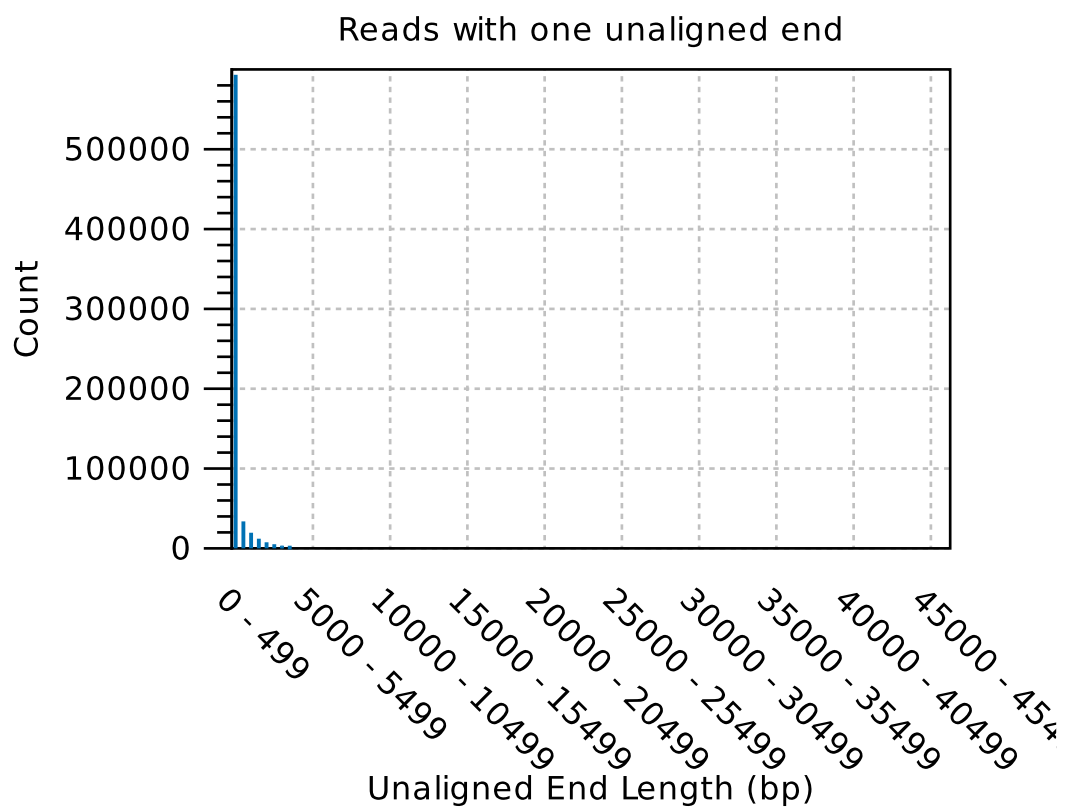

## Reads with two unaligned ends

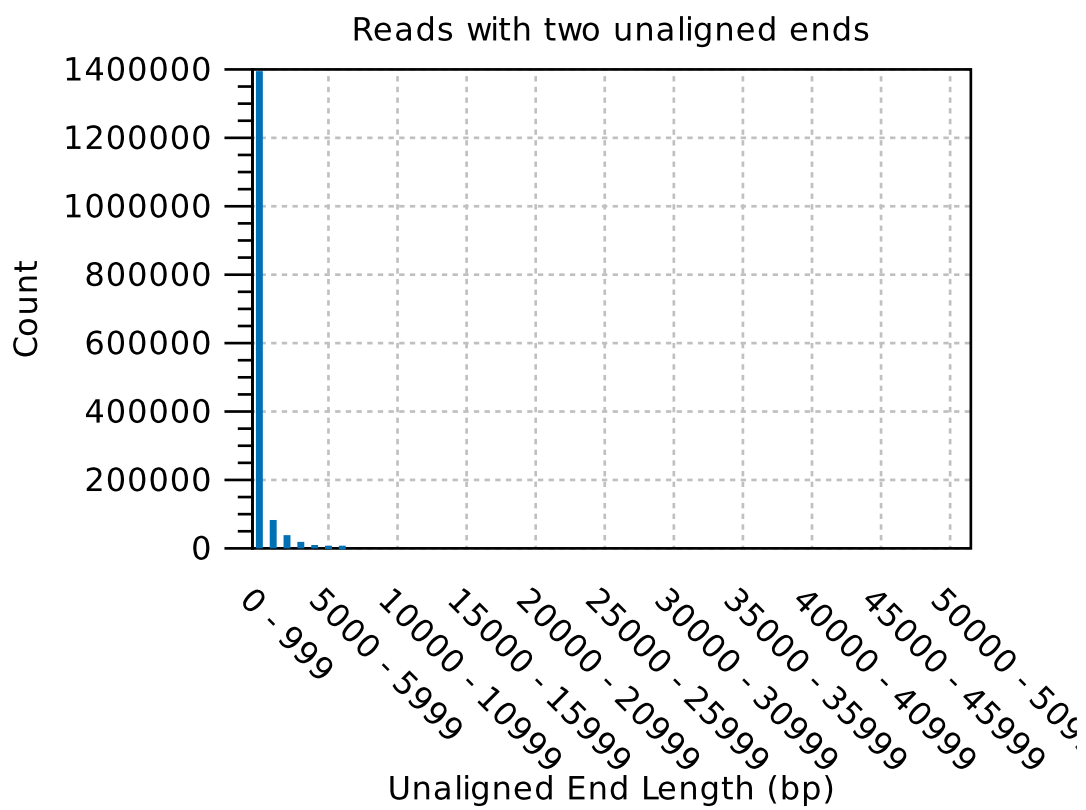

Supplement: 12864_2018_5164_MOESM3_ESM.pdf [file 12864_2018_5164_MOESM3_ESM.pdf]
