# Supplementary material for: Correcting palindromes in long reads after whole-genome amplification
Source: PubMed Central journal article supplement (PMC6218980; doi:10.1186/s12864-018-5164-1), 2018-11-06

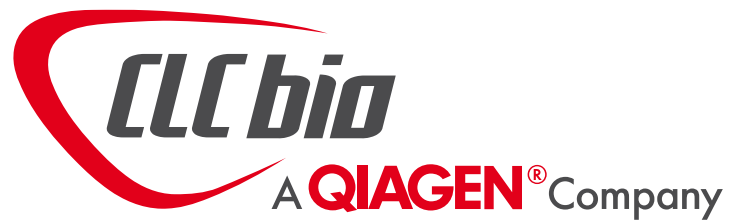

Mapping Report for ath.all.raw BLASR-mapping  
Type: Read mapping  
Reference count: 7  
Generated by: warri004  
Date: Sun May 08 19:11:45 CEST 2016  
Software: CLC Genomics Server 7.5.1

## Table of contents

|                                                                     |    |
|---------------------------------------------------------------------|----|
| 1. Summary .....                                                    | 3  |
| 2. References .....                                                 | 3  |
| 2.1 Reference coverage .....                                        | 3  |
| 2.2 Coverage statistics .....                                       | 3  |
| 2.3 Coverage level distribution .....                               | 4  |
| 2.4 Coverage level distribution (excl. zero coverage regions) ..... | 5  |
| 2.5 Zero coverage regions .....                                     | 6  |
| 2.6 Coverage vs GC Content Plot .....                               | 6  |
| 3. Mapped reads .....                                               | 6  |
| 3.1 All mapped reads .....                                          | 6  |
| 3.2 Non-specific matches .....                                      | 7  |
| 3.3 Non-perfect matches .....                                       | 8  |
| 3.4 Read length distribution .....                                  | 11 |
| 3.5 Insertion length distribution .....                             | 12 |
| 3.6 Deletion length distribution .....                              | 13 |
| 3.7 Nucleotide differences in reads relative to reference .....     | 13 |
| 3.8 Nucleotide Mapping .....                                        | 13 |
| 3.9 Quality for match distribution .....                            | 17 |
| 3.10 Quality for mismatch distribution .....                        | 17 |
| 3.11 Mismatch fraction per read position .....                      | 18 |
| 3.12 Unaligned ends .....                                           | 18 |

# 1. Summary

|                        |               |
|------------------------|---------------|
| Reference count        | 7             |
| Type                   | Read mapping  |
| Total reference length | 119,667,750   |
| GC contents in %       | 36.00         |
| Total read count       | 897,995       |
| Mean read length       | 8,986.75      |
| Total read length      | 8,070,059,681 |

# 2. References

## 2.1 Reference coverage

|                               |             |
|-------------------------------|-------------|
| Total reference length        | 119,667,750 |
| % GC                          | 36.00       |
| Total consensus length        | -           |
| Fraction of reference covered | 1.00        |

## 2.2 Coverage statistics

|                                                |             |
|------------------------------------------------|-------------|
| Total reference length                         | 119,667,750 |
| Minimum coverage                               | 0           |
| Maximum coverage                               | 9,052       |
| Average coverage                               | 40.51       |
| Standard deviation                             | 134.33      |
| Minimum excl. zero coverage regions            | 1           |
| Average excl. zero coverage regions            | 40.60       |
| Standard deviation excl. zero coverage regions | 134.46      |

## 2.3 Coverage level distribution

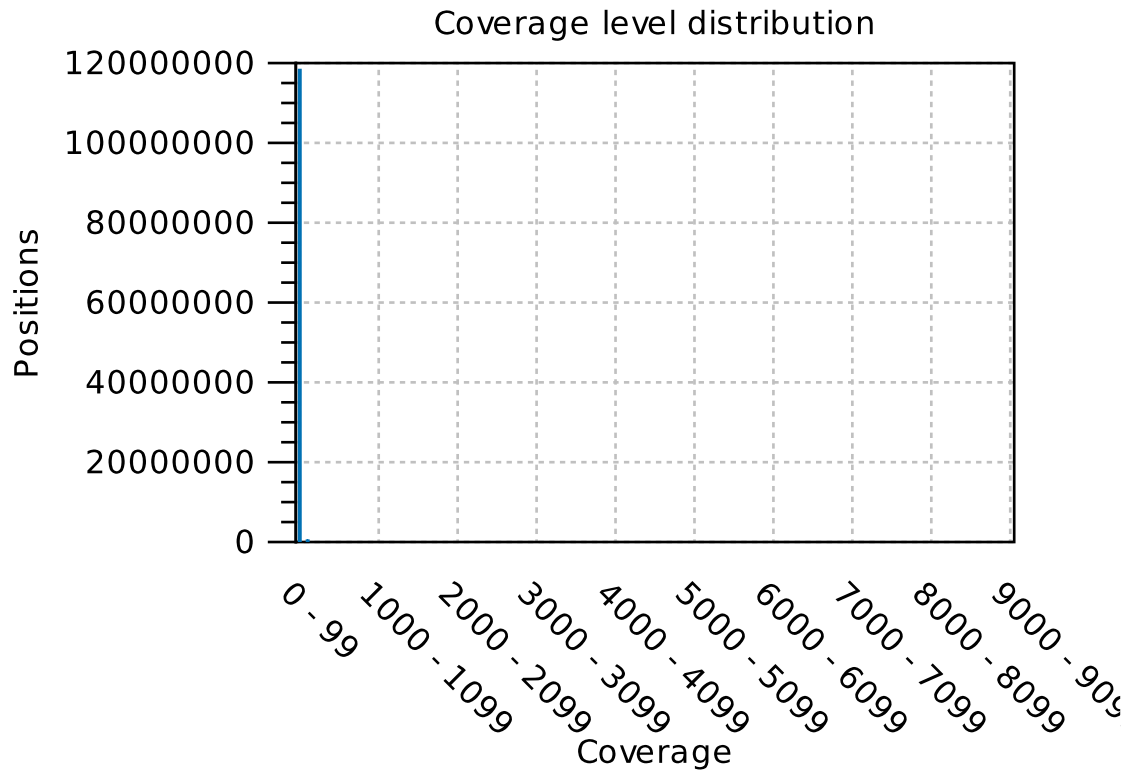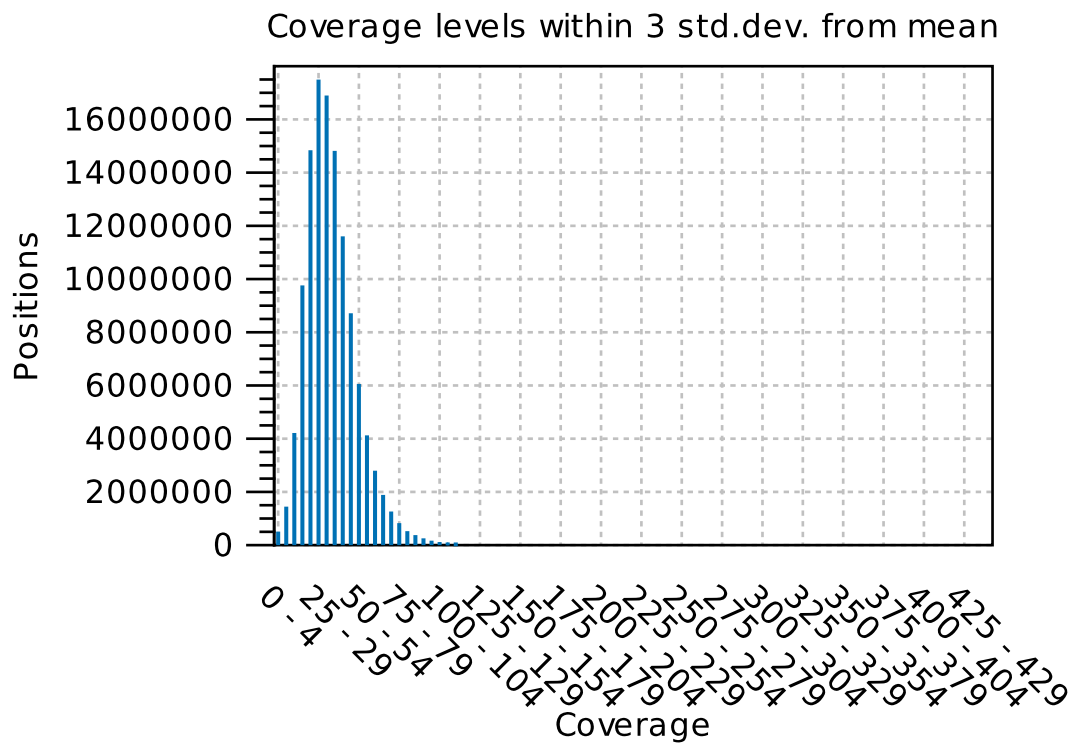

119,455,733 positions have coverage between 0 and 443.  
212,017 positions have coverage above 443 (not shown in graph).

## 2.4 Coverage level distribution (excl. zero coverage regions)

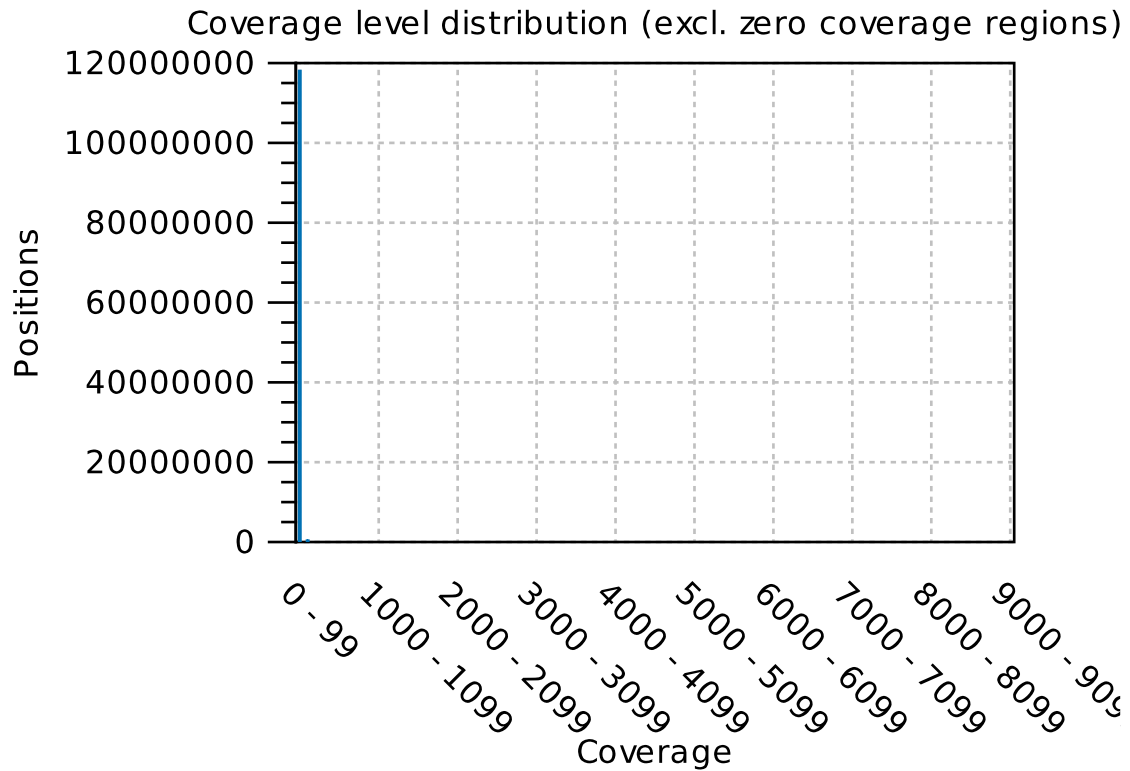

239,624 positions have zero coverage (not shown in graph).

Coverage levels within 3 std.dev. from mean (excl. zero coverage)

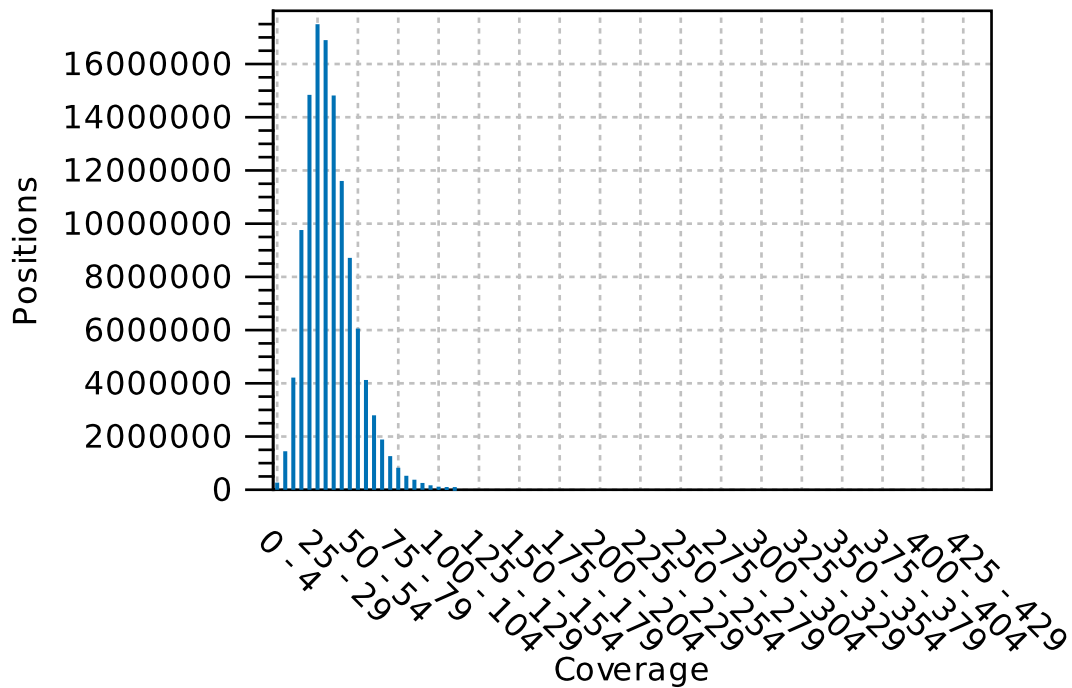

239,624 positions have coverage below 1 (not shown in graph).

119,216,109 positions have coverage between 1 and 443.

212,017 positions have coverage above 443 (not shown in graph).

## 2.5 Zero coverage regions

|                    |          |
|--------------------|----------|
| Count              | 342      |
| Minimum length     | 1        |
| Maximum length     | 55,751   |
| Mean length        | 700.65   |
| Standard deviation | 4,882.76 |
| Total length       | 239,624  |

## 2.6 Coverage vs GC Content Plot

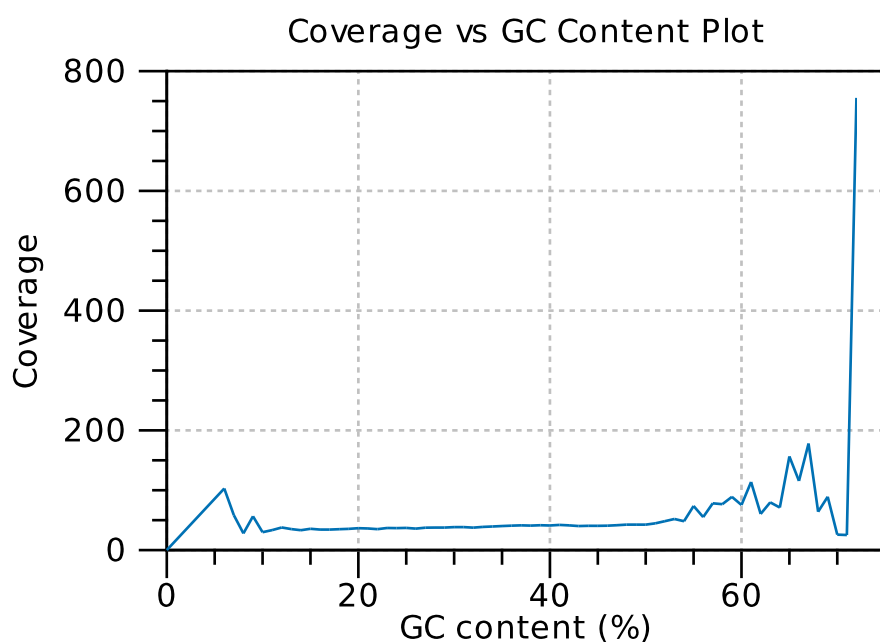

The plot displays, for each GC content level (0-100%), the mean read coverage of 100bp reference segments with that GC content.

## 3. Mapped reads

### 3.1 All mapped reads

|                   |               |
|-------------------|---------------|
| Read count        | 897,995       |
| Mean read length  | 8,986.75      |
| Total read length | 8,070,059,681 |

## 3.2 Non-specific matches

### *Non-specific matches*

|                       |             |
|-----------------------|-------------|
| Read count            | 32,658      |
| % of all mapped reads | 3.64        |
| Mean read length      | 8,841.40    |
| Total read length     | 288,742,282 |

### *Distribution of match specificity (all matches)*

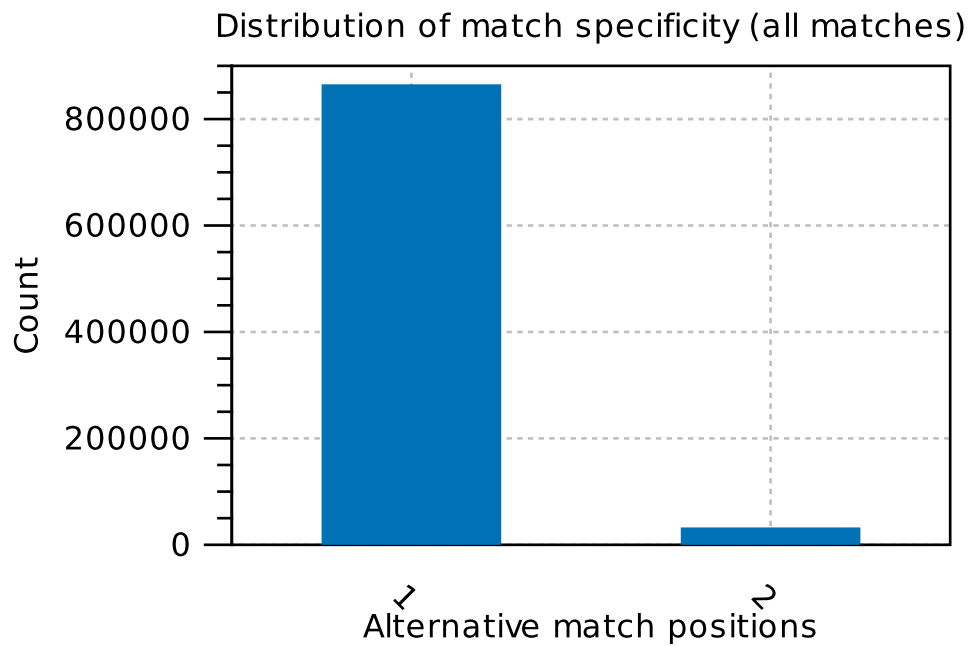

## Distribution of match specificity (non-specific matches)

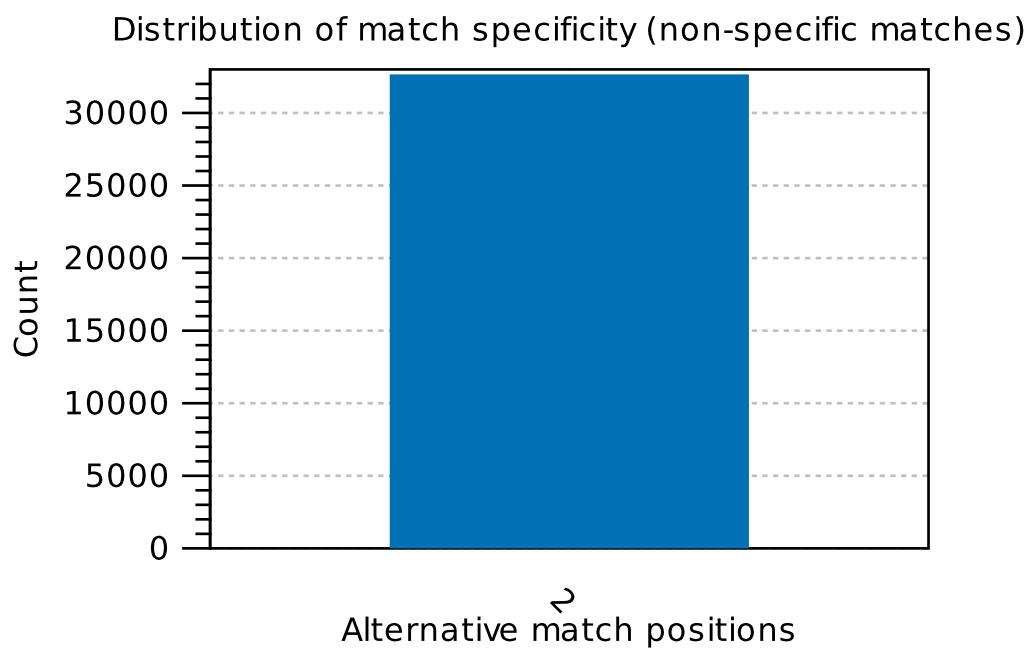

### 3.3 Non-perfect matches

#### Non-perfect matches

|                       |               |
|-----------------------|---------------|
| Read count            | 897,995       |
| % of all mapped reads | 100.00        |
| Mean read length      | 8,986.75      |
| Total read length     | 8,070,059,681 |



*Distribution of mismatches (all matches)*

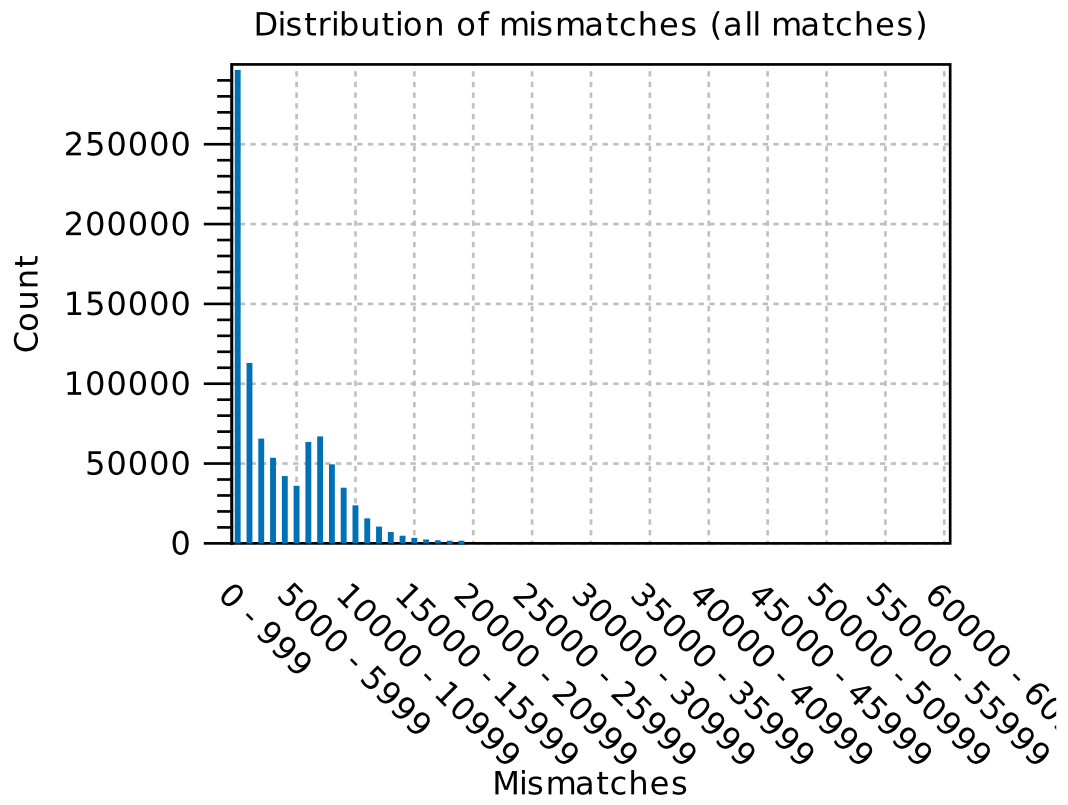

*Distribution of mismatches (non-perfect matches)*

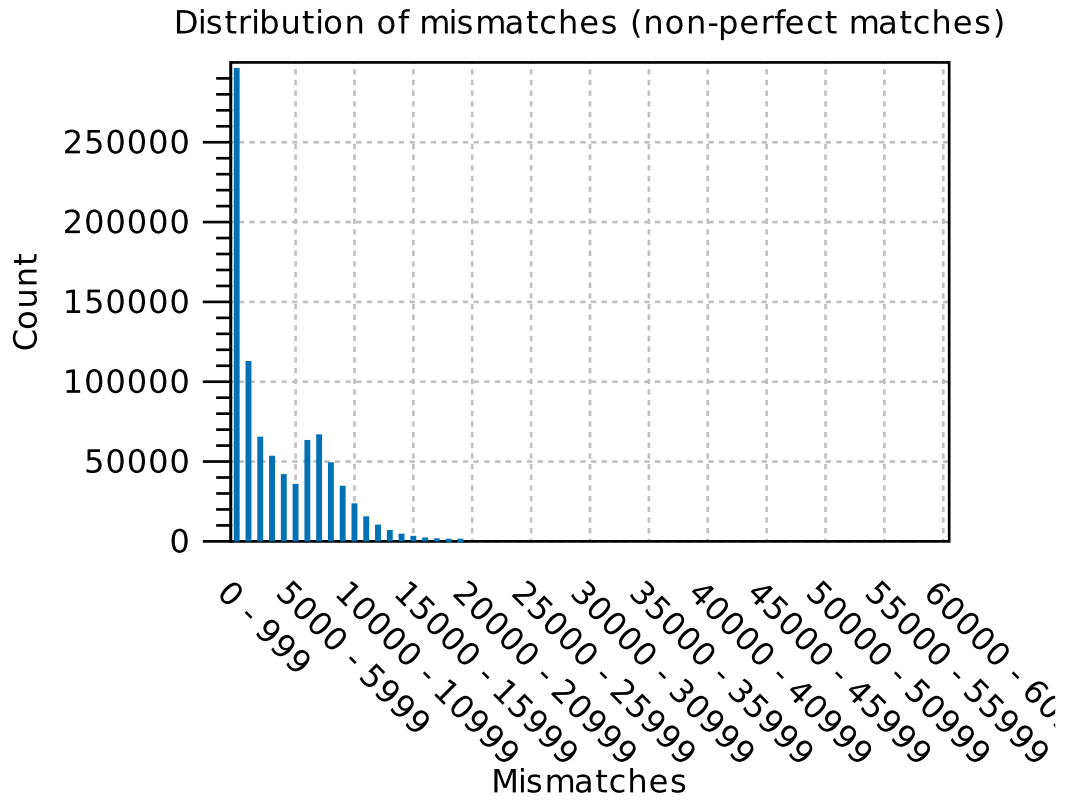

### 3.4 Read length distribution

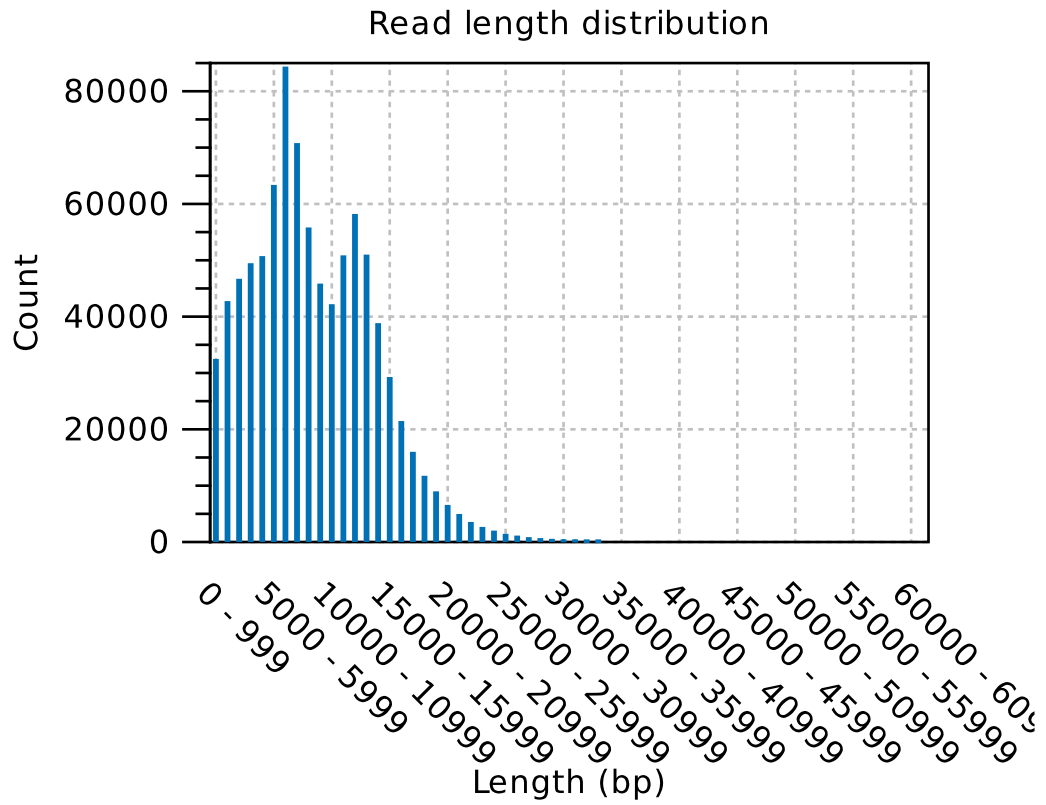

### 3.5 Insertion length distribution

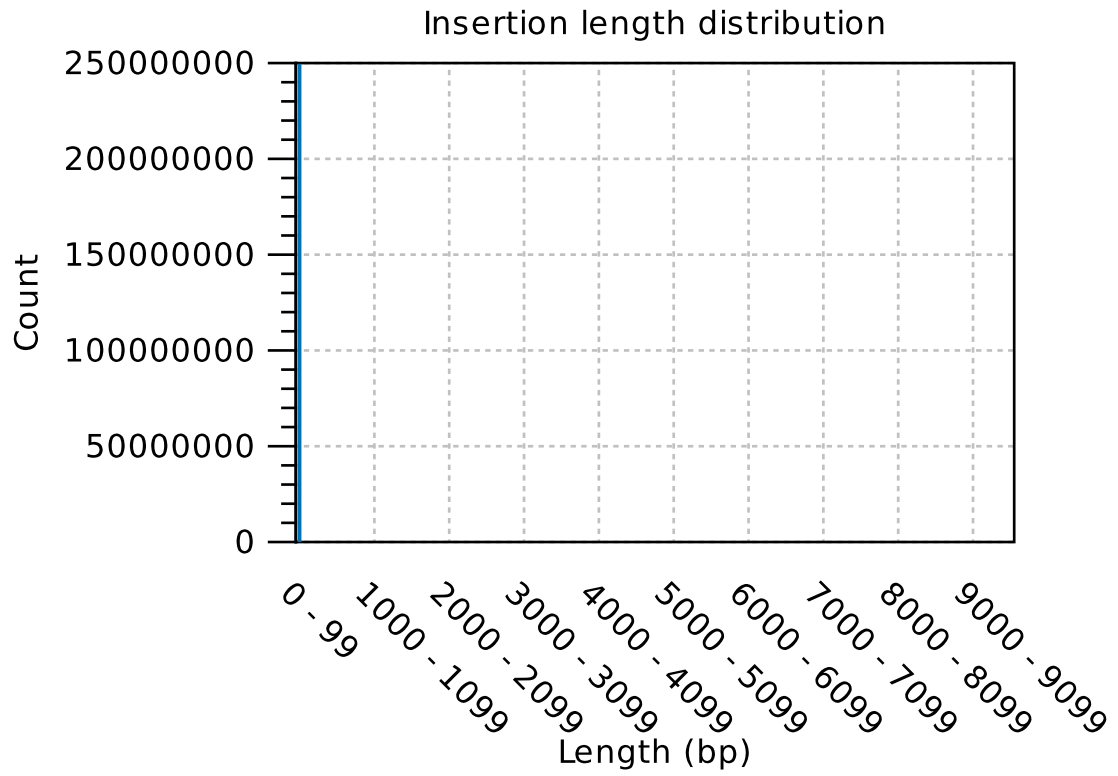

### 3.6 Deletion length distribution

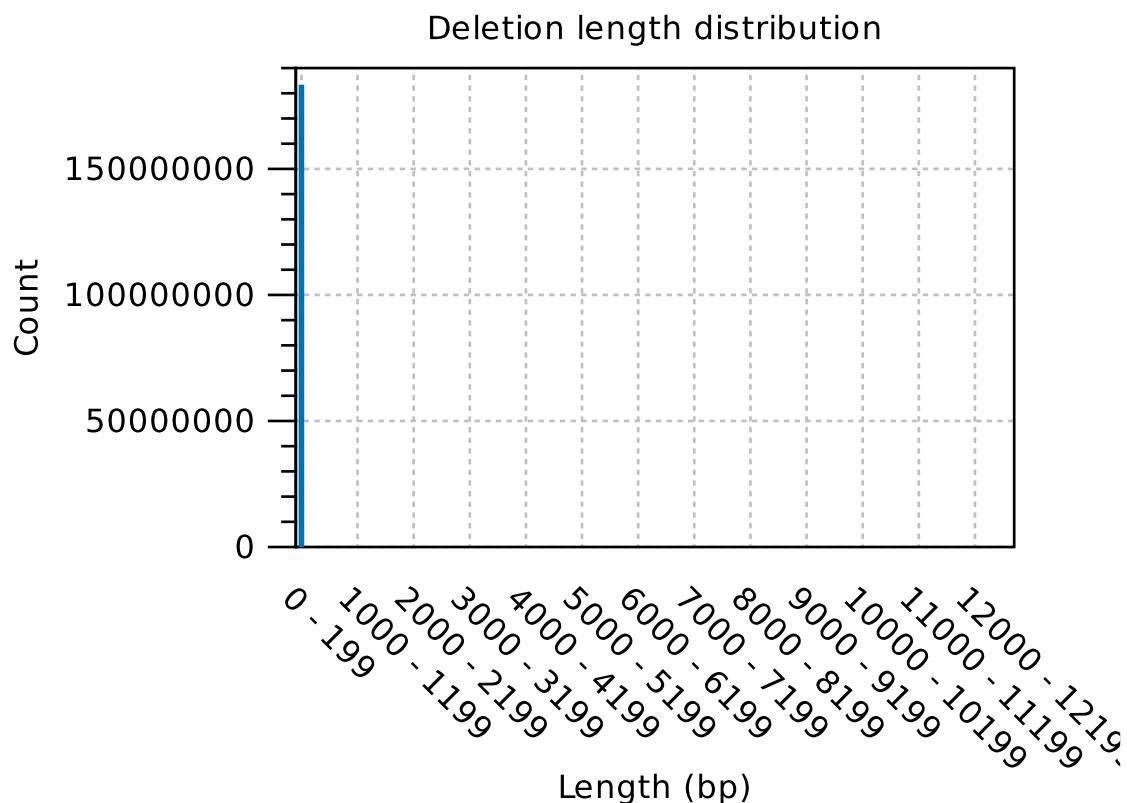

### 3.7 Nucleotide differences in reads relative to reference

| Nucleotide in reference | % read bases that differ |
|-------------------------|--------------------------|
| A                       | 5.21                     |
| C                       | 6.32                     |
| G                       | 6.41                     |
| T                       | 5.19                     |
| -                       | 1.50                     |
| Total                   | 2.21                     |

### 3.8 Nucleotide Mapping

#### Counts

|              |               |             |             |               |
|--------------|---------------|-------------|-------------|---------------|
| Reference: A | 1,453,303,550 | 5,194,493   | 3,610,864   | 5,052,653     |
| Reference: C | 5,321,675     | 833,180,529 | 2,338,108   | 3,591,947     |
| Reference: G | 3,640,546     | 2,366,955   | 835,944,332 | 5,489,773     |
| Reference: T | 5,056,101     | 3,550,412   | 5,234,665   | 1,452,956,153 |
| Reference: - | 103,461,645   | 69,868,580  | 69,771,025  | 103,615,842   |

|       |               |             |             |               |
|-------|---------------|-------------|-------------|---------------|
| Total | 1,570,783,517 | 914,160,969 | 916,898,994 | 1,570,706,368 |
|-------|---------------|-------------|-------------|---------------|

| Read: -        | Total          |
|----------------|----------------|
| 65,956,118     | 1,533,117,678  |
| 44,970,549     | 889,402,808    |
| 45,742,576     | 893,184,182    |
| 65,741,798     | 1,532,539,129  |
| 22,831,701,445 | 23,178,418,537 |
| 23,054,112,486 | 28,026,662,334 |

### Percentages

|              |      |      |      |      |
|--------------|------|------|------|------|
| Reference: A | 5.19 | 0.02 | 0.01 | 0.02 |
| Reference: C | 0.02 | 2.97 | 0.01 | 0.01 |
| Reference: G | 0.01 | 0.01 | 2.98 | 0.02 |
| Reference: T | 0.02 | 0.01 | 0.02 | 5.18 |
| Reference: - | 0.37 | 0.25 | 0.25 | 0.37 |
| Total        | 5.60 | 3.26 | 3.27 | 5.60 |

| Read: - | Total  |
|---------|--------|
| 0.24    | 5.47   |
| 0.16    | 3.17   |
| 0.16    | 3.19   |
| 0.23    | 5.47   |
| 81.46   | 82.70  |
| 82.26   | 100.00 |

## Relative errors (reference to read)

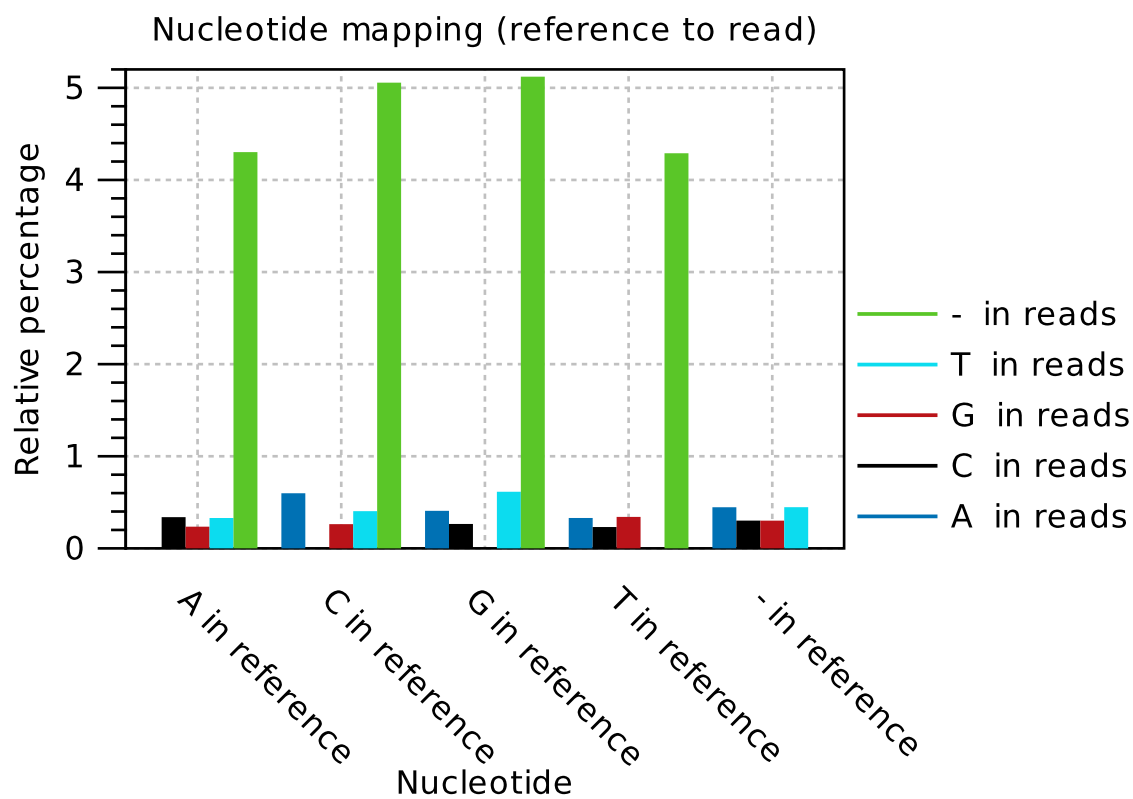

Bars depict off-diagonal element counts divided by counts in the column with header "total ".

*Error counts (reference to read)*

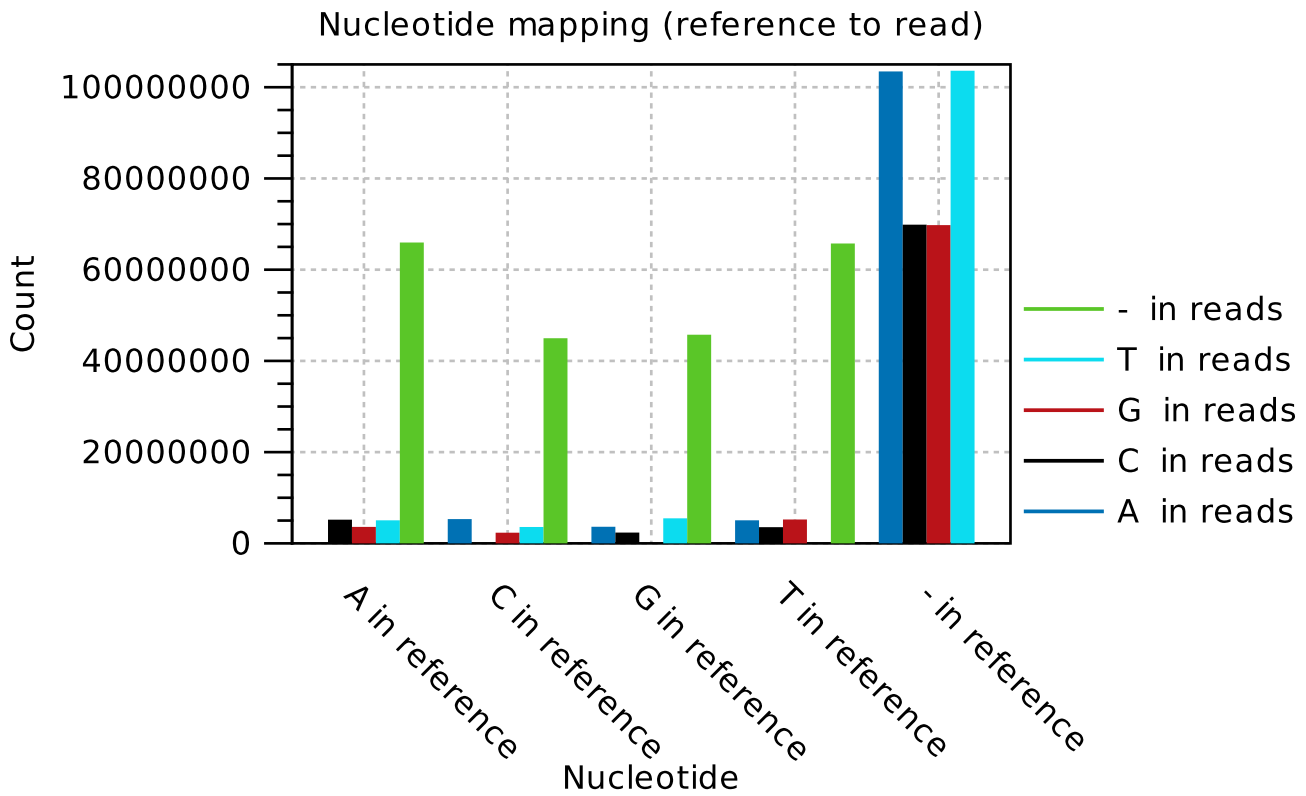

Bars depict off-diagonal element counts.

*Relative errors (read to reference)*

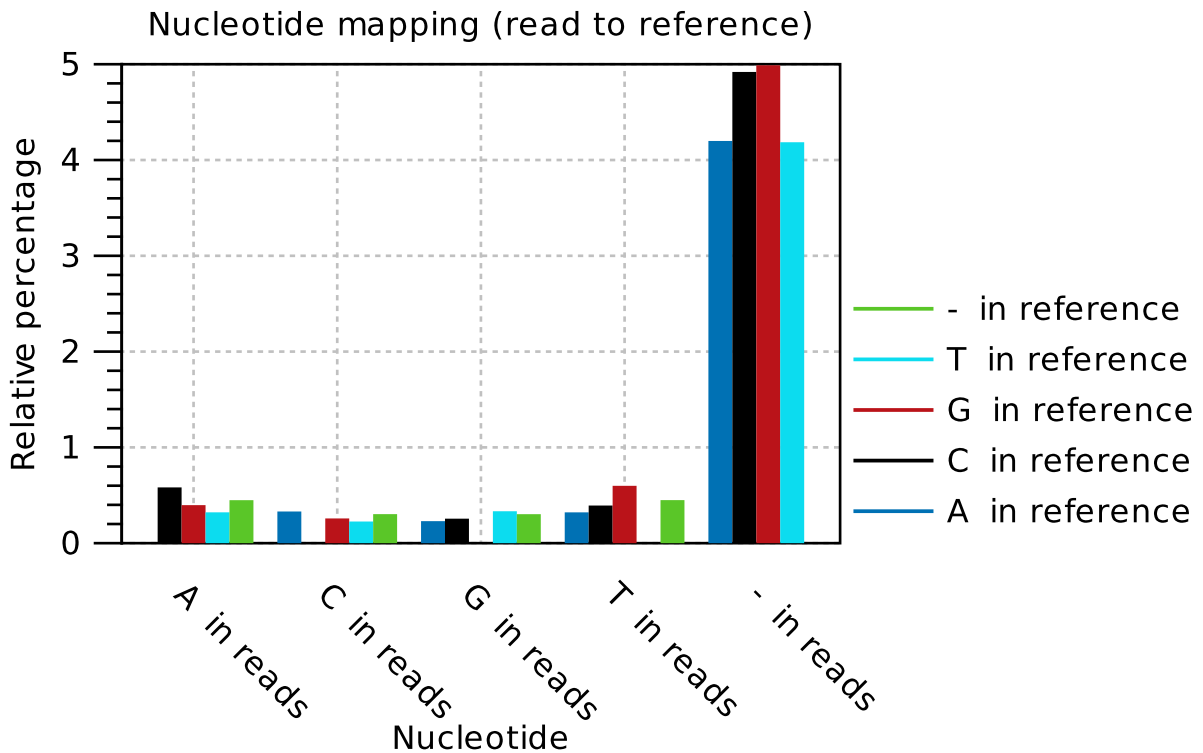



Bars depict off-diagonal element counts divided by counts in the row with header "total".

### Error counts (read to reference)

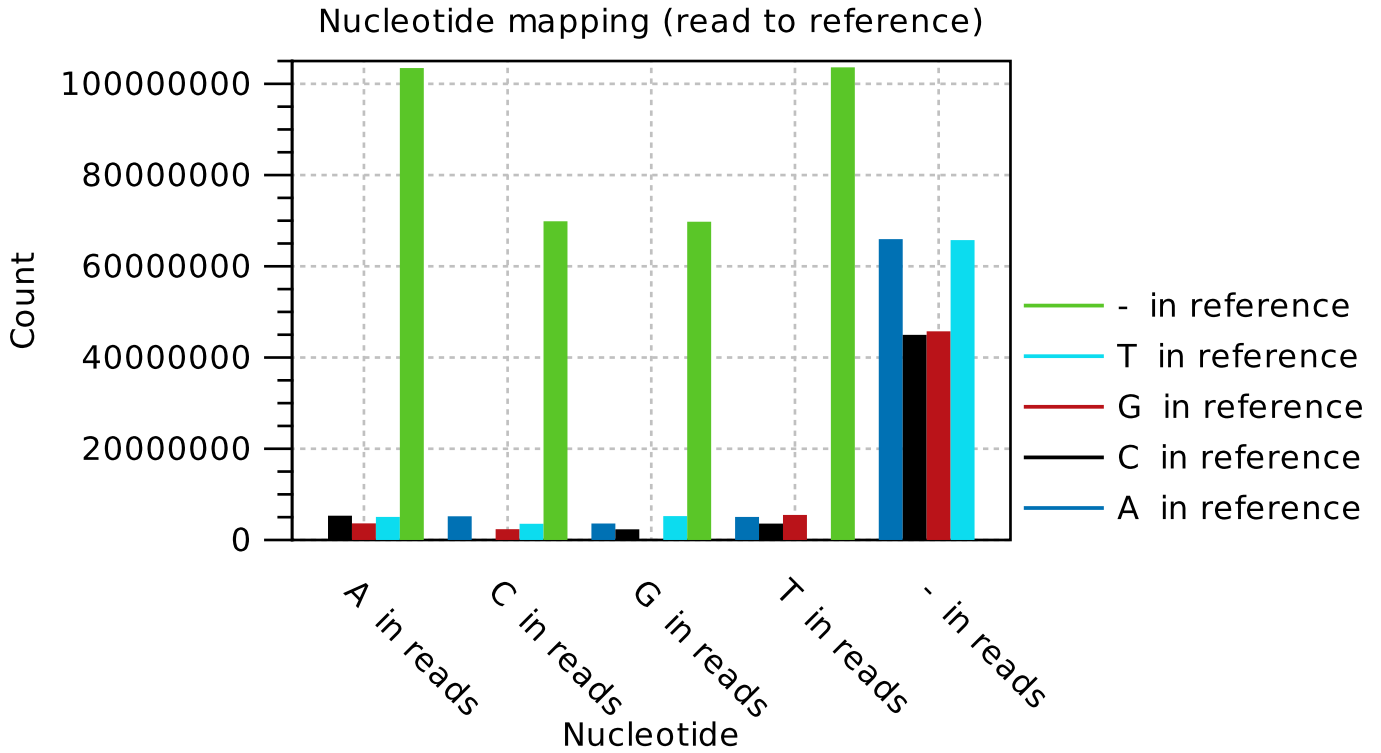

Bars depict off-diagonal element counts.

### 3.9 Quality for match distribution

There are no qualities.

### 3.10 Quality for mismatch distribution

There are no qualities.

### 3.11 Mismatch fraction per read position

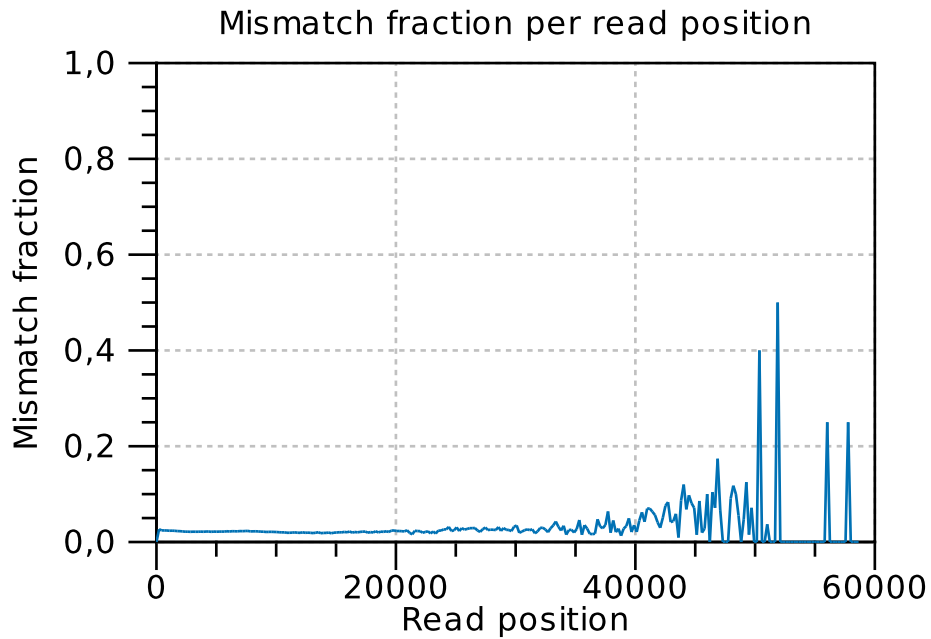

The plot displays the mismatch fraction per read position in the sequenced segments

### 3.12 Unaligned ends

|                                         |           |
|-----------------------------------------|-----------|
| Read count                              | 1,488,261 |
| % of all mapped reads                   | 165.73    |
| Positions covered                       | 1,332,781 |
| Positions covered in % of reference     | 1.11      |
| Positions covered in % of bases covered | 1.12      |

*Reads with one unaligned end*

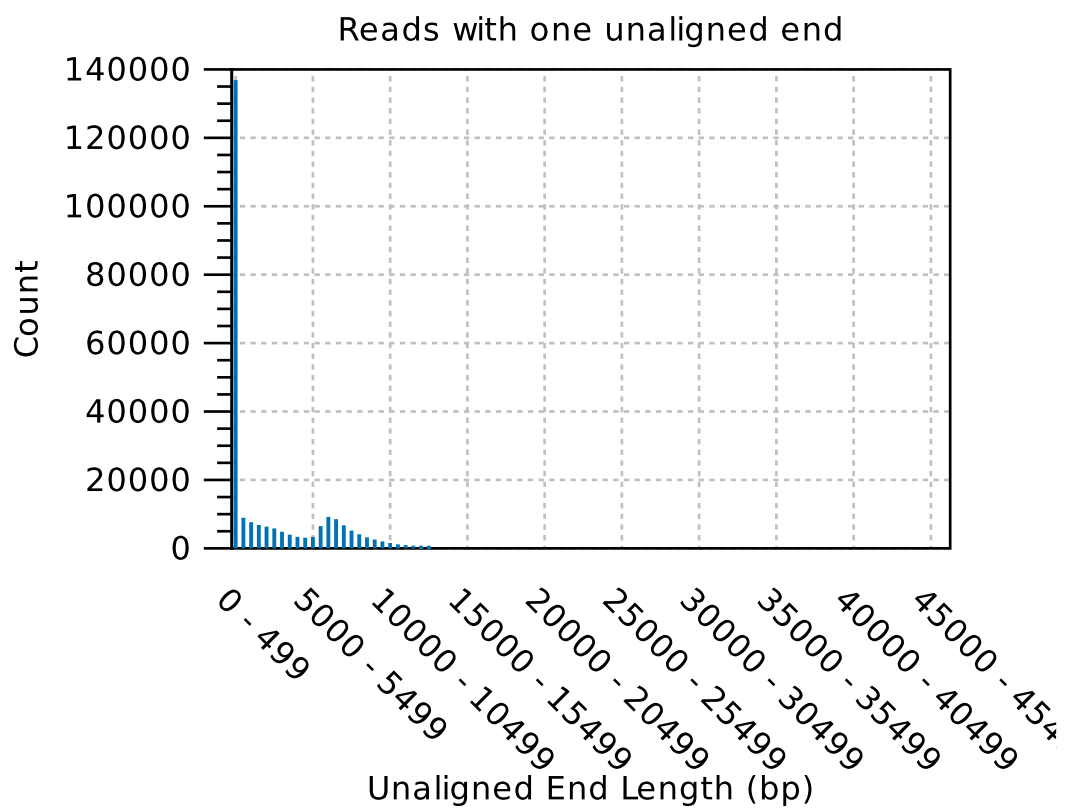

## Reads with two unaligned ends

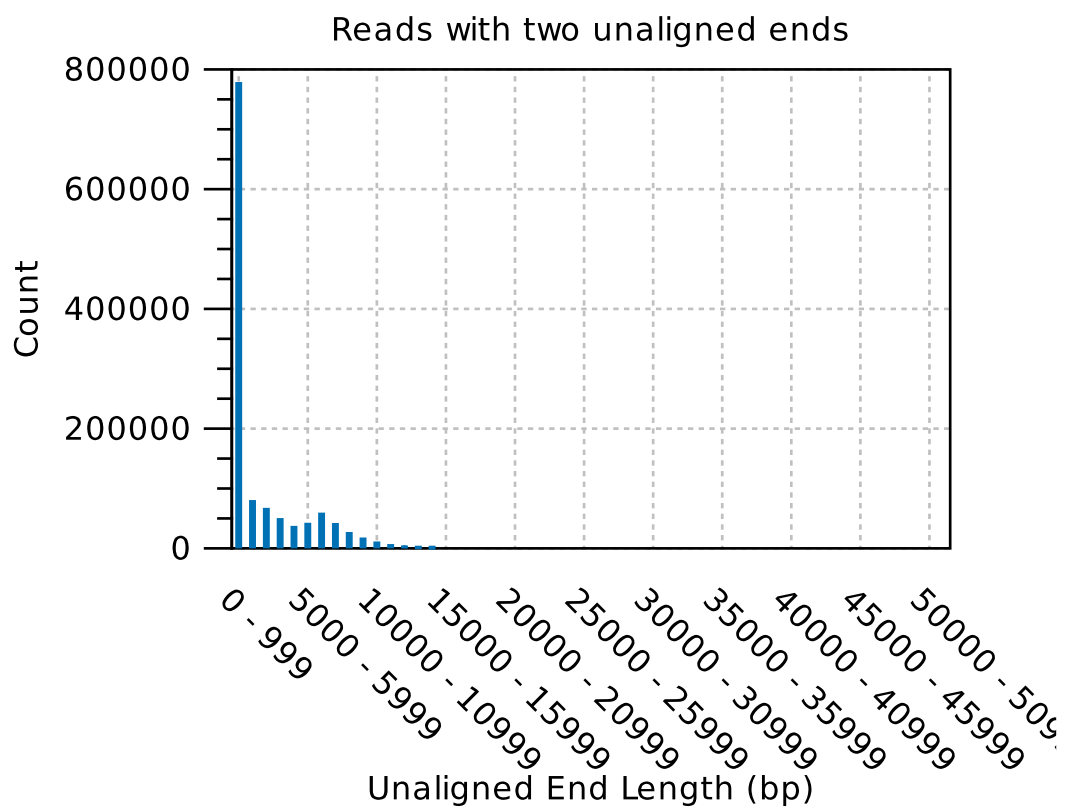

Supplement: 12864_2018_5164_MOESM4_ESM.pdf [file 12864_2018_5164_MOESM4_ESM.pdf]
